1  
2  
3  
4  
5  
6  
7  
8  
9  
10  
11  
12  
13  
14  
15  
16  
17  
18  
19  
20  
21  
22  
23  
24  
25  
26  
27  
28  
29  
30  
31  
32  
33  
34  
35  
36  
37  
38  
39

# **MaTAR25 LncRNA Regulates the *Tensin1* Gene to Impact Breast Cancer Progression**

Kung-Chi Chang<sup>1,2</sup>, Sarah D. Diermeier<sup>1,8,\*</sup>, Allen T. Yu<sup>1,3,\*</sup>, Lily D. Brine<sup>1</sup>, Suzanne Russo<sup>1</sup>, Sonam Bhatia<sup>1</sup>, Habeeb Alsudani<sup>1</sup>, Karen Kostroff<sup>4</sup>, Tawfiqul Bhuiya<sup>5</sup>, Edi Brogi<sup>6</sup>, C. Frank Bennett<sup>7</sup>, Frank Rigo<sup>7</sup>, and David L. Spector<sup>1,2,3,#</sup>

<sup>1</sup>Cold Spring Harbor Laboratory, Cold Spring Harbor, NY 11724

<sup>2</sup>Molecular and Cellular Biology Program, Stony Brook University, Stony Brook, NY 11794

<sup>3</sup>Genetics Program, Stony Brook University, Stony Brook, NY 11794

<sup>4</sup>Department of Surgical Oncology, Northwell Health, Lake Success, NY 11042

<sup>5</sup>Department of Pathology, Northwell Health, Lake Success, NY 11042

<sup>6</sup>Memorial Sloan Kettering Cancer Center, New York, NY 10065

<sup>7</sup>Ionis Pharmaceuticals, Carlsbad, CA 92010

<sup>8</sup>Current address: Department of Biochemistry, University of Otago, Dunedin 9016, New Zealand

\* These authors contributed equally to this work.

# Correspondence: [spector@cshl.edu](mailto:spector@cshl.edu)

David L.Spector is a consultant to, and receives research support from, Ionis Pharmaceuticals

40 **SUMMARY**

41  
42 Misregulation of long non-coding RNA genes has been linked to a wide variety of  
43 cancer types. Here we report on Mammary Tumor Associated RNA 25 (*MaTAR25*), a  
44 nuclear enriched and chromatin associated lncRNA that plays a role in mammary tumor  
45 cell proliferation, migration, and invasion, both *in vitro* and *in vivo*. *MaTAR25* functions  
46 by interacting with purine rich element binding protein B (PURB), and associating with a  
47 major downstream target gene *Tensin 1* (*Tns1*) to regulate its expression in *trans*.  
48 Knockout of *MaTAR25* results in down-regulation of *Tns1* leading to a reorganization of  
49 the actin cytoskeleton, and a reduction of focal adhesions and microvilli. The human  
50 ortholog of *MaTAR25*, *LINC01271*, is upregulated with human breast cancer stage and  
51 metastasis.

52

53 **SIGNIFICANCE**

54 LncRNAs have great potential to reveal new regulatory mechanisms of function  
55 as well as having exciting therapeutic capacity given their ease of being targeted by  
56 nucleic acid drugs. Our study of *MaTAR25*, and its human ortholog *LINC01271*, reveal  
57 an unexpected function of this lncRNA in breast cancer progression by regulating *Tns1*  
58 gene expression, whose protein product is a critical component of focal adhesions  
59 linking signaling between the extracellular matrix and the actin cytoskeleton. We  
60 identified *LINC01271* as the human ortholog of *MaTAR25*, and importantly, increased  
61 expression of *LINC01271* is associated with poor patient prognosis and cancer  
62 metastasis. Our findings demonstrate that *LINC01271* represents an exciting  
63 therapeutic target to alter breast cancer progression.

## 64 INTRODUCTION

65 Breast cancer is the most common cancer among women in the United States  
66 and world-wide, with an estimated 268,600 new cases of invasive disease in women in  
67 the United States in 2019 (1). Although breast cancer mortality has been decreasing  
68 over the past two decades, it is still the second leading cause of cancer deaths in  
69 American women accounting for 15% of all cancer deaths. Breast tumors can be  
70 classified into multiple subtypes based on histological evaluation and the most frequent  
71 type of breast tumors are ductal carcinomas, which affect the milk ducts of the breast.  
72 Ductal carcinomas can further be separated into two groups: non-invasive ductal  
73 carcinoma *in situ* (DCIS), and invasive ductal carcinoma (IDC) which accounts for 75%  
74 of all breast cancers (2, 3). Breast cancer is recognized as a heterogeneous disease  
75 and molecular classification of invasive breast carcinomas can stratify tumors into  
76 informative subtypes and provide key prognostic signatures. In addition to traditional  
77 pathological characterization and immunohistochemistry (IHC) to examine protein levels  
78 of markers such as estrogen receptor (ER), progesterone receptor (PR) and epidermal  
79 growth factor receptor-2 (HER2), additional studies evaluating genomic rearrangements  
80 and molecular expression profiles of breast cancers have provided further genetic  
81 insights to better understand the disease (4-6). These approaches have identified six  
82 major molecular subtypes of breast cancer (luminal A, luminal B, HER2-enriched, triple  
83 negative/basal-like, normal breast-like, and claudin-low) (7), each displaying different  
84 phenotypic and molecular features and which have distinct clinical outcomes.

85 In recent years, large scale genome-wide studies indicated that thousands of  
86 RNAs can be transcribed from the human and mouse genomes that lack protein-coding

87 capacity (8-10). In particular, long non-coding RNAs (lncRNAs) with a length  $\geq 200$   
88 nucleotides have been suggested to play key roles in a diverse range of biological  
89 processes (11-13). Most lncRNAs are capped, spliced, and poly-adenylated (8). In  
90 addition, many lncRNAs are expressed in a tissue-specific and/or cell type specific  
91 manner, and are involved in various gene regulatory pathways (14, 15). Furthermore,  
92 misregulation of lncRNA expression has been linked to various diseases including  
93 neuromuscular diseases, developmental disorders, neurodegenerative diseases, and  
94 cancers (16-20). Several lncRNAs have been implicated as regulatory molecules in  
95 breast cancer progression and metastasis through different mechanisms (21, 22). For  
96 example, the *HOX* antisense intergenic RNA (*HOTAIR*) is overexpressed in primary  
97 breast tumors and can alter the localization pattern of Polycomb repressive complex 2  
98 (PRC2) and histone methylation to regulate gene expression in breast carcinoma cells  
99 impacting breast cancer progression and metastasis (23). Recent findings suggest that  
100 the lncRNA breast cancer anti-estrogen resistance 4 (*BCAR4*) (24) can control GLI  
101 family zinc finger 2 (*GLI2*) gene expression to promote cancer cell migration by  
102 interacting with Smad nuclear interacting protein 1 (*SNIP1*) and serine/threonine-protein  
103 phosphatase 1 regulatory subunit 10 (*PNUTS*). Targeting *BCAR4* by locked nucleic  
104 acids (LNA) in mouse models significantly affects cancer cell invasion and reduces lung  
105 metastases (25). Genetic knockout or ASO-mediated knockdown of *Metastasis*  
106 *Associated Lung Adenocarcinoma Transcript 1* (*Malat1*) was shown to result in  
107 differentiation of primary mammary tumors and a significant reduction in metastasis  
108 (26). In addition to transcriptional regulation, lncRNAs can have other regulatory roles.  
109 For example, the lncRNA *PVT1* has been shown to stabilize the Myc oncoprotein in

110 breast cancer cells (27), and the lncRNA NKILA can interact with and stabilize the NF-  
111  $\kappa$ B/I $\kappa$ B complex and inhibit breast cancer metastasis (28). However, for the majority of  
112 lncRNAs, the exact function and molecular mechanism of action in breast cancers still  
113 awaits detailed characterization. Previously, we performed an RNA sequencing (RNA-  
114 seq) screen to identify differentially expressed lncRNAs between mammary tumor cells  
115 and normal mammary epithelial cells. From this screen, we identified 30 previously  
116 uncharacterized lncRNAs as Mammary Tumor Associated RNAs (*MaTARs*) 1-30 (29).

117 Here, we examined the role of *MaTAR25* in mammary tumor progression and  
118 metastasis. We find that genetic knockout of *MaTAR25* in highly aggressive 4T1 triple  
119 negative (ER-, PR-, HER2-) mammary carcinoma cells results in a reduction in cell  
120 proliferation, migration, and invasion. Knockout cells transplanted into the mammary fat  
121 pad of BALB/c mice results in a significant decrease in tumor growth as compared to  
122 4T1 control cells. Further, tail vein injection of luciferase labeled *MaTAR25* knockout  
123 cells showed reduced homing to the lungs and a significant decrease in metastatic  
124 nodules. In a complementary study, antisense oligonucleotide (ASO) mediated  
125 knockdown (KD) of *MaTAR25* in the MMTV-Neu-NDL mouse model resulted in a  
126 significant decrease in tumor growth and a reduction in lung metastases. Analysis of the  
127 molecular function of *MaTAR25* indicates that it regulates the *Tns1* gene at the  
128 transcriptional level. Loss of *MaTAR25* results in a reduction of *Tns1* at the RNA and  
129 protein levels and a subsequent reorganization of the actin cytoskeleton and a reduction  
130 in focal adhesions and microvilli. Together, our data reveal *MaTAR25*, and its identified  
131 human ortholog *LINC01271*, as an exciting therapeutic candidate whose expression can  
132 be altered to impede breast cancer progression and metastasis.

133

## 134 **RESULTS**

### 135 **Characterization of *MaTAR25*, a nuclear enriched lncRNA**

136 We previously performed an RNA-seq screen to identify lncRNAs over-  
137 expressed in mammary tumors vs normal mammary epithelial cells as a means to  
138 identify potential candidates involved in mammary cancer progression, and to explore  
139 their potential as therapeutic targets or key biomarkers in human breast cancer (29).  
140 Among those lncRNA genes identified, the *MaTAR25* gene on mouse chromosome 2  
141 was originally annotated as 1200007C13Rik and it encodes a single transcript  
142 containing two exons (Fig. 1A). *MaTAR25* is overexpressed in mammary tumors in the  
143 MMTV-Neu-NDL (HER2 subtype) model compared to normal mammary epithelial cells  
144 and it is also upregulated in luminal and triple negative sub-types of mammary cancer  
145 (29). Analysis of ENCODE and FANTOM5 RNA-seq data has shown there is little to no  
146 expression of *MaTAR25* in normal mouse tissues compared to MMTV-Neu-NDL tumor  
147 cells (29, 30) (Supplementary Fig. S1A). The full length *MaTAR25* transcript was  
148 determined to be 1,978 nucleotides by 5' and 3' rapid amplification of cDNA ends  
149 (RACE) and Sanger sequencing (Fig. 1B), which was further confirmed by Northern blot  
150 analysis (Fig. 1C).

151 According to three independent computational coding potential prediction  
152 programs, the *MaTAR25* RNA transcript has very low protein coding potential and is  
153 suggested to be a non-coding RNA (Supplementary Fig. S1B-S1D). However, there is  
154 one predicted open reading frame (ORF) with the potential to generate a 123 amino  
155 acid peptide (~13 kDa). In order to assess whether a peptide is encoded by the

156 *MaTAR25* transcript we performed *in vitro* transcription and translation. Compared to a  
157 luciferase DNA control (expected size 61 kDa) and a *Xenopus laevis* Histone H2B  
158 (HISTH2B) expressing plasmid control (expected size 14 kDa), there was no detectable  
159 peptide generated from a plasmid that contained the *MaTAR25* sequence (Fig. 1D).  
160 Together, these computational and experimental results confirm that *MaTAR25* does  
161 not make a peptide, and thus is a bona fide lncRNA.

162 In order to determine the localization and abundance of *MaTAR25* we performed  
163 single molecule RNA fluorescence in situ hybridization (smRNA-FISH) to detect  
164 *MaTAR25* RNA transcripts within MMTV-PyMT (luminal B) and MMTV-Neu-NDL  
165 (Her2/neu+) primary mammary tumor cells. The majority of *MaTAR25* transcripts were  
166 detected in cell nuclei (Fig. 1E) and each nucleus contained ~10-15 transcript foci. Thus,  
167 *MaTAR25* is a nuclear-enriched lncRNA with a potential role in the regulation of gene  
168 expression in mammary cancer cells.

169

### 170 ***MaTAR25* knockout decreases 4T1 cell viability/migration/invasion**

171 To assess the functional role of *MaTAR25*, we proceeded to genetically knockout  
172 (KO) *MaTAR25* in highly aggressive 4T1 triple negative (ER-, PR-, HER2-) mammary  
173 carcinoma cells using CRISPR/Cas9. We designed gRNA pairs targeting various  
174 regions upstream and downstream of the transcription start site (TSS) of *MaTAR25* to  
175 create a genomic deletion (Fig. 2A and Supplementary Fig. S2A). *MaTAR25* knockout  
176 clones were single cell sorted and selected by Sanger sequencing, qRT-PCR, as well  
177 as smRNA-FISH (Fig. 2A and Supplementary Fig. S2B).

178 After selecting several *MaTAR25* KO clones, we evaluated them for alterations

179 in cell viability, migration, and invasion as compared to 4T1 control cells. *MaTAR25*  
180 KO cells exhibited a significant decrease of 50% in cell viability as compared to 4T1  
181 control cells (Fig. 2B). To further investigate this phenotype, we performed BrdU  
182 labeling and FACS analysis, which demonstrated a two-fold increase in G2 cells  
183 suggesting that the decreased proliferation phenotype is most likely the result of a  
184 lengthened G2 phase (Supplementary Fig. S2C). As cell migration and invasion are  
185 critical processes associated with metastasis we were interested in determining  
186 whether *MaTAR25* loss might play a role in these events. We used a live cell tracking  
187 assay to assess cell migration and we found a 40% reduction in cell motility upon loss  
188 of *MaTAR25* (Fig. 2C and Supplementary Fig. S2D). A wound healing assay also  
189 corroborated the observed difference in cell migration between 4T1 control and  
190 *MaTAR25* KO cells (Supplementary Fig. S2E). Finally, we used a Boyden chamber  
191 invasion assay and found that loss of *MaTAR25* resulted in a 45% reduction in  
192 invasion ability as compared to 4T1 control cells (Fig. 2D).

193 In order to exclude the possibility that the phenotypes observed in *MaTAR25*  
194 KO cells were caused by disrupting chromatin structure rather than specific loss of the  
195 *MaTAR25* transcript, we generated single cell ectopic overexpression clones of  
196 *MaTAR25* in 4T1 *MaTAR25* KO cells. Ectopic expression of *MaTAR25* rescued both  
197 the cell proliferation and invasion phenotypes (Fig. 2E-2F), indicating that *MaTAR25*  
198 RNA plays an important role in these processes *in situ*, and likely exhibits its effect *in*  
199 *trans*. Hence, *MaTAR25* appears to be an important lncRNA impacting mammary  
200 tumor cell growth and critical aspects of metastasis. To further explore *MaTAR25*'s  
201 downstream targets, we performed RNA-seq to identify differentially expressed genes



202 by comparing *MaTAR25* KO cells with 4T1 control cells (Supplementary Table S1).  
203 Pathway analysis of the differentially expressed genes by Kyoto Encyclopedia of  
204 Genes and Genomes (KEGG) and Gene Set Enrichment Analysis (GSEA) revealed  
205 alteration in cell cycle and DNA related processes, both related to the phenotypes we  
206 observed in *MaTAR25* KO cells (Supplementary Fig. S2F).

207

### 208 ***MaTAR25* knockout decreases tumor progression/metastasis *in vivo***

209 In order to further evaluate the functional impact and the therapeutic potential of  
210 *MaTAR25* in mammary tumor progression, we performed multiple *in vivo* studies.  
211 Injection of *MaTAR25* 4T1 KO cells into the mammary fat pad of BALB/c mice resulted  
212 in a significant 56% decrease in tumor growth at day 28, compared to the 4T1 control  
213 injected group (Fig. 3A-3B). In addition, we performed tail vein injection using *MaTAR25*  
214 KO cells expressing a luciferase reporter to track cancer cell homing and metastasis to  
215 the lungs in BALB/c mice. The *in vivo* bioluminescence signal in the lungs of mice  
216 injected with *MaTAR25* KO cells was reduced (Supplementary Fig. S3A) compared to  
217 those injected with 4T1 control cells. At day 21, the number of metastatic nodules in  
218 lung samples collected from the *MaTAR25* KO group was also significantly decreased  
219 by 62% compared to the 4T1 control group (Fig. 3C).

220 As a complementary approach to CRISPR/Cas9 KO we designed a series of  
221 *MaTAR25* specific antisense oligonucleotides (ASOs), (16mers) comprised of  
222 phosphorothioate-modified short S-cEt (S-2'-O-Et-2',4'-bridged nucleic acid)  
223 gapmer chemistry (31-33). We individually screened multiple ASOs targeting *MaTAR25*  
224 to identify the most effective ASOs in terms of knockdown (KD) efficiency by qRT-PCR

225 after 48 hours and 72 hours of ASO treatment in 4T1 cells. The two most effective  
226 *MaTAR25* ASOs achieved a knockdown ranging from 70-90% (Supplementary Fig.  
227 S1E). When comparing *MaTAR25* ASO treated cells to mock or scrambled ASO  
228 (scASO) treated 4T1 control cells after 72 hours, we found a significant decrease in cell  
229 viability using cell counting assays (-45% for ASO1 and -38% for ASO2)  
230 (Supplementary Fig. S1F), consistent with our KO studies indicating that *MaTAR25* has  
231 a role in mammary cancer cell proliferation.

232 Furthermore, to assess the therapeutic potential of reducing the level of  
233 *MaTAR25 in vivo*, we evaluated the impact of subcutaneous injection of two  
234 independent *MaTAR25* ASOs for their *in vivo* ability to knockdown *MaTAR25* and to  
235 impact mammary tumor progression in the MMTV-Neu-NDL mouse model. ASO  
236 mediated knockdown of *MaTAR25* resulted in a 59% decrease in tumor growth  
237 compared to the scASO control group (Fig. 3D and Supplementary Fig. S3B). By  
238 comparing the hematoxylin and eosin (H&E) stained tumor sections collected from the  
239 *MaTAR25* ASO injected group with the scASO control group, we observed a strong  
240 level of necrosis in the *MaTAR25* ASO treated mammary tumor samples (Fig. 3E) but  
241 not in other non-tumor tissues (Supplementary Fig. S3C). Importantly, mammary tumors  
242 from the scASO control group lacked any significant necrotic phenotype (Fig. 3E). We  
243 also collected lung samples from each group to examine for the presence of micro-  
244 metastases, and the H&E stained lung sections showed that KD of *MaTAR25* resulted  
245 in a 40% incidence rate of micro-metastatic nodules in lungs from ASO1 or ASO2  
246 treated animals as compared to a 76.9% incidence rate for the scASO control group  
247 (Supplementary Fig. S3D). Together, our *in vitro* and *in vivo* data indicate that

248 *MaTAR25* plays a critical role in promoting mammary tumor progression and  
249 metastasis.

250

251 ***MaTAR25* is a positive upstream regulator of *Tns1*, a mediator of cell-matrix**  
252 **adhesion and migration**

253         Next, we were interested in revealing aspects of the molecular mechanism of  
254 action of *MaTAR25* in regulating mammary tumor progression. Since we previously  
255 identified *MaTAR25* to be highly enriched in cell nuclei by smRNA-FISH we went on to  
256 perform cell fractionation to isolate cytoplasmic and nucleoplasmic lysates as well as  
257 chromatin pellets of 4T1 cells to determine the subcellular enrichment of *MaTAR25* by  
258 qRT-PCR analysis. Notably, compared to the enrichment of  $\beta$ -*actin* and *Malat1*, we  
259 found a significant enrichment of *MaTAR25* in the nucleoplasmic and chromatin  
260 fractions (Fig. 4A), indicating that the molecular mechanism of action of *MaTAR25* may  
261 be related to transcriptional regulation. To test this hypothesis, we performed Chromatin  
262 Isolation by RNA Purification (ChIRP) (34) to pull down RNA/DNA complexes by using  
263 specific biotin-labeled antisense oligonucleotides targeting *MaTAR25* (Fig. 4B) as well  
264 as biotin-labeled antisense oligonucleotides targeting housekeeping gene PPIB  
265 transcripts as the corresponding control. ChIRP-seq identified *MaTAR25* genomic  
266 targeting sites, and revealed that these targets are highly enriched in simple repeats  
267 regions and LTRs (log ratio enrichments to input are 2-3 fold) (Supplementary Fig.  
268 S4A). According to motif analysis these regions are potential binding sites of the  
269 transcription factors ZNF354C, TEAD, GATA1, and REL (data not shown). Combining  
270 the *MaTAR25* KO RNA-seq data and ChIRP-seq results, we found a total of 446

271 overlapping genes (Fig. 4C and Supplementary Table S1), which could be downstream  
272 targets regulated by *MaTAR25*. Among these overlapping genes, the top gene ranked  
273 by ChIRP-seq data, just under *MaTAR25* itself, is *Tensin1* (*Tns1*) (Fig. 4C and  
274 Supplementary Fig. S4B). The *Tns1* gene encodes for a protein that localizes to focal  
275 adhesions and positively regulates cell migration and invasion (35, 36). By qRT-PCR  
276 and immunoblot analysis, we found that the RNA and protein levels of *Tns1* are  
277 significantly lower in *MaTAR25* KO cells than in 4T1 control cells (Fig. 4D). Interestingly,  
278 ectopic expression of *MaTAR25* in *MaTAR25* KO cells results in a correspondingly  
279 increased level of *Tns1* (Fig. 4E). Hence, we conclude that *Tns1* is a direct downstream  
280 target of *MaTAR25* and further confirming that it imparts its function *in trans*. In order to  
281 confirm the ChIRP-seq result and to further investigate how *MaTAR25* might regulate  
282 the level of *Tns1*, we next performed double-label DNA-FISH to detect the *MaTAR25*  
283 (Chr2) and *Tns1* (Chr1) gene loci in cells, and we found no physical interaction between  
284 these genomic loci (Supplementary Fig. S4D, upper panels). However, combined  
285 *MaTAR25* smRNA-FISH and *Tns1* DNA-FISH in the same cells showed that *MaTAR25*  
286 RNA was overlapping with at least one *Tns1* allele in 50% of the cells (Supplementary  
287 Fig. S4D, lower panels). This suggests that *MaTAR25* RNA transcripts can bind to the  
288 gene body of *Tns1* to regulate its expression. We therefore performed CRISPR/Cas9  
289 knockout using gRNAs targeting *Tns1* in 4T1 cells and selected *Tns1* KO clones for *in*  
290 *vitro* functional assays. We found that the *Tns1* KO cells phenocopied the *MaTAR25* KO  
291 cells and exhibited a significant 40% decrease in cell viability (Fig. 4F) and a 30%  
292 decrease in cell migration vs control cells (Supplementary Fig. S4E). In addition, ectopic  
293 expression of *Tns1* in 4T1 *MaTAR25* KO cells can rescue the cell viability phenotype

294 (Fig. 4G). Interestingly, high expression of *TNS1* is strongly correlated with poor survival  
295 of grade 3 breast cancer patients (37) (Supplementary Fig. S4C). Together, these data  
296 indicate that *Tns1* is a critical downstream target of *MaTAR25*.

297         Since *Tns1* is a key component of focal adhesion complexes and is responsible  
298 for cell-cell and cell-matrix interactions as well as cell migration by interacting with actin  
299 filaments (38), we examined the organization of actin filaments, as well as the  
300 additional focal adhesion complex components paxillin and vinculin (39), in 4T1 control  
301 and *MaTAR25* KO cells by immunofluorescence (IF) confocal microscopy. Indeed, the  
302 F-actin microfilaments are disrupted (Fig. S4G1 and Supplementary Fig. S4G2) and the  
303 distribution of paxillin and vinculin proteins are altered dramatically (Supplementary Fig.  
304 S4H) in 4T1 *MaTAR25* KO cells as compared to 4T1 control cells. Interestingly, both  
305 ectopic expression of *MaTAR25* or *Tns1* in 4T1 *MaTAR25* KO cells can rescue the  
306 actin filament phenotype (Supplementary Fig. S4G3 and S4G4), supporting our finding  
307 that *Tns1* is a critical downstream target of *MaTAR25* regulating mammary tumor  
308 progression. To further evaluate the phenotype of *MaTAR25* KO cells we used  
309 transmission electron microscopy (TEM) (Supplementary Fig. S4F). TEM clearly  
310 revealed a dramatic 81% reduction of microvilli over the cell surface of *MaTAR25* KO  
311 cells compared to 4T1 control cells, indicating loss of *MaTAR25* expression impacts the  
312 actin bundling process (Supplementary Fig. S4H) as well as microvilli  
313 formation/maintenance in 4T1 cells.

314

315 ***MaTAR25* interacts with PURB to carry out its function**

316 It has been suggested that lncRNAs can interact with transcriptional regulators/co-  
317 factors to form ribonucleoprotein (RNP) complexes to regulate the expression of  
318 downstream genes in the cell nucleus (40). To identify *MaTAR25* interacting proteins we  
319 used two different paired sets of biotin-labeled antisense oligonucleotides targeting  
320 *MaTAR25* for native RNA antisense oligonucleotide pull-down (RAP) in 4T1 cells  
321 followed by qRT-PCR which revealed a 50-60% pull-down efficiency (Supplementary  
322 Fig. S5A). Samples were eluted from beads for mass spectrometry isobaric tags for  
323 relative and absolute quantitative (MS-iTRAQ) analysis to identify proteins that bind to  
324 *MaTAR25*, and PPIB as the corresponding control. We ranked the candidate interactors  
325 based on detectable peptides above background in both pair sets of oligonucleotide  
326 pull-downs, and selected candidates with at least 2-fold enrichment compared to  
327 corresponding PPIB oligo pull-down (Fig. 5A). Among the protein candidates, two  
328 transcription co-regulators always appeared on the top list between multiple runs. These  
329 are purine rich element binding protein A (PURA) and purine rich element binding  
330 protein B (PURB), which can form homodimers or heterodimers in the nucleus (41).  
331 Additionally, one other protein, Y-box protein 1 (YBX1) also on the candidate list, but  
332 which did not pass the enrichment criteria, was shown in a previous study to interact  
333 with PURA to form a PURB/PURA/YBX1 heterotrimer (42). To verify our MS result, we  
334 first performed immunoblot analysis with PURA and PURB antibodies and we could  
335 detect extremely higher signals of PURA and PURB in samples of *MaTAR25*  
336 oligonucleotide pull-down than the PPIB oligonucleotide pull-down (Fig. 5B). When RAP  
337 was carried out with the same sets of oligonucleotide pairs using ND1 cells, the MS  
338 result showed a greater enrichment of PURB than PURA (data not shown). Based on

339 these data, we hypothesized that PURB is the lead protein directly binding to *MaTAR25*.  
340 Immunoblot analysis using pull-down samples from 4T1 and 4T1 *MaTAR25* KO cell  
341 lysates (Fig. 5B) plus pull-down samples from NDL primary cell lysates (Supplementary  
342 Fig. S5B) confirmed the specific interaction between *MaTAR25* and PURB. RNA  
343 immunoprecipitation (RIP) using PURB antibodies compared to IgG control also  
344 revealed the specificity of the *MaTAR25*-PURB interaction (Fig. 5C). To further confirm  
345 the role of PURB in regulating *Tns1* we manipulated the level of PURB in 4T1 cells  
346 either through ectopic overexpression (Fig. 5D) or siRNA mediated knockdown and  
347 demonstrated upregulation or down-regulation of *Tns1*, respectively (Supplementary Fig.  
348 S5C). Next, to determine if the interaction between *MaTAR25* and PURB is related to  
349 the expression of *Tns1* we examined the level of *Tns1* expression in each group. The  
350 results confirmed that the expression level of *Tns1* is related to the changes in PURB  
351 expression level in 4T1 cells, indicating that the *MaTAR25*/PURB RNP complex is  
352 essential for the regulation of *Tns1*.

353 *Tns1* isoform 3 was identified as the major isoform expressed in MMTV-Neu-NDL  
354 and 4T1 cells (data not shown). Based on our ChIRP-seq result, we were able to go on  
355 to identify the promoter region of *Tns1* isoform 3, which contains a very high  
356 purine:pyrimidine ratio (3:1) including many potential PURB binding sequence motifs  
357 (GGTGG) (43), as the main targeting region in the *Tns1* gene (Supplementary Fig. S5D).  
358 Moreover, Hypergeometric Optimization of Motif EnRichment (HOMER) motif analysis  
359 based on ChIRP-seq data indicated the top enriched motif sequence of *MaTAR25*  
360 interacting genes is GGTGGTGGAGAT further supporting the *MaTAR25* PURB binding  
361 motif sequence (Supplementary Fig. S5E). Therefore, we performed Chromatin

362 immunoprecipitation (ChIP) using a PURB antibody and multiple qPCR primer pairs and  
363 showed that PURB has a high occupancy capacity over this region of *Tns1*. Importantly,  
364 the occupancy was impaired in *MaTAR25* KO cells and was able to be restored upon  
365 ectopic expression of *MaTAR25* in 4T1 *MaTAR25* KO cells (Fig. 5E). Together, these  
366 results provide compelling evidence indicating the interaction of PURB protein with  
367 *MaTAR25* is required for PURB binding to regulatory motifs in the *Tns1* gene in 4T1  
368 cells.

369

### 370 **Human lincRNA *LINC01271* is the human ortholog of *MaTAR25***

371 In order to translate our exciting findings in regard to mouse *MaTAR25* to the  
372 human system for potential future clinical applications, we went on to characterize the  
373 human ortholog of *MaTAR25* and confirm its function in human breast cancer cells.  
374 Based on syntenic conservation between the human and mouse genomes, we  
375 previously found three lincRNAs as potential human counterparts of *MaTAR25*:  
376 *LINC01270*, *LINC01271*, and *LINC01272* (29) (Fig. 6A). Among these three lincRNAs,  
377 only *LINC01271* is transcribed in the same direction as *MaTAR25*. Analysis of The  
378 Cancer Genome Atlas (TCGA) data (29) suggests two of these potential orthologs,  
379 *LINC01270* and *LINC01271*, are expressed at increased levels in multiple sub-types of  
380 breast cancer (Fig. 6A). Therefore, we focused on these two lincRNAs and performed  
381 independent ectopic expression of *LINC01271* and *LINC01270* in 4T1 *MaTAR25* KO  
382 cells to determine if one of these human lincRNAs could rescue the mouse *MaTAR25*  
383 KO phenotype. Cell viability assays indicated that ectopic expression of *LINC01271*, but  
384 not *LINC01270*, can rescue the proliferation phenotype of *MaTAR25* KO cells (Fig. 6B).



385 Invasion assays also showed that ectopic expression of *LINC01271* in 4T1 *MaTAR25*  
386 KO cells can rescue the cell invasion phenotype (Fig. 6C). In addition, the expression of  
387 *Tns1* can also be restored to a similar level as in 4T1 control cells upon overexpression  
388 of *LINC01271* in *MaTAR25* KO cells (Fig. 6D). Immunoprecipitation (RIP) using the  
389 PURB antibody indicated a specific interaction between PURB and *LINC01271*  
390 (Supplementary Fig. S6A) in human triple negative breast cancer MDA-MB-231 LM2  
391 cells (44). Next, we performed smRNA-FISH to examine the localization of *LINC01271*  
392 within MDA-MB-231 LM2 cells and we found that similar to *MaTAR25* it is a nuclear  
393 enriched RNA (Supplementary Fig.S6C). Together, these results validate *LINC01271* as  
394 the human ortholog of *MaTAR25*.

395

396 ***LINC01271* may play a role in human breast cancer progression and have**  
397 **diagnostic and/or therapeutic potential**

398 We performed ASO mediated KD of *LINC01271* in MDA-MB-231 LM2 cells and  
399 selected the three most effective *LINC01271* ASOs to assess a KD phenotype. After  
400 96 hours of ASO treatment to mediate KD of *LINC01271* in MDA-MB-231 LM2 cells,  
401 all three independent ASOs decreased cell viability by approximately 32% (Fig. 6E).  
402 The KD result supports a role for *LINC01271* in human breast cancer progression.

403 According to the lncRNA database TANRIC (45), higher expression of *LINC01271*  
404 is correlated with poor breast cancer patient survival (Supplementary Fig. S6D). qRT-  
405 PCR analysis of the expression level of *LINC01271* in breast tumor organoids vs  
406 organoids derived from normal adjacent breast tissue showed a higher expression  
407 level of *LINC01271* in tumor-derived organoids (Supplementary Fig. S6E).

408           Next, we performed smRNA-FISH to localize *LINC01271* in patient breast tumor  
409 sections. We found that *LINC01271* expression level was increased with increased  
410 breast tumor stage (Fig. 7A and Supplementary Fig. S7A), and we identified the  
411 presence of clonal and regional differential expression patterns in most of the breast  
412 tumor patient samples (Supplementary Fig. S7B). Most interestingly, lung metastases  
413 exhibited higher expression of *LINC01271* than primary tumors from the same patients  
414 (Fig. 7B and Supplementary Fig. S7C). Thus, together these findings from patient-  
415 derived samples support our hypothesis that *LINC01271* is a potential therapeutic  
416 target to impact breast cancer progression and metastasis.

417

## 418 **DISCUSSION**

419           We identified *MaTAR25* as a lncRNA that is upregulated in Her2+, luminal, and  
420 TNBC as compared to normal mammary epithelial cells. Genetic KO or ASO KD of  
421 *MaTAR25* results in a reduction in cell proliferation, migration, and invasion. Introduction  
422 of *MaTAR25* 4T1 KO cells into mice by mammary fat pad injection or tail vein injection  
423 results in smaller tumor growth and a significant reduction in lung metastases. The  
424 human ortholog of *MaTAR25* was identified as *LINC01271* and it is expressed in  
425 primary breast tumors and at even higher levels in lung metastases. Increased  
426 expression of the human ortholog of *MaTAR25* is associated with poor patient  
427 prognosis (44).

428

429 ***MaTAR25* regulates expression of the *Tns1* gene**

430 In order to elucidate the molecular mechanism by which *MaTAR25* imparts its  
431 function, we used ChIRP-seq and RNA-seq to identify and validate the *Tns1* gene as a  
432 direct downstream target of *MaTAR25*. *MaTAR25* positively regulates the expression of  
433 *Tns1* in mammary tumor cells through binding to its DNA sequence in *trans*. *Tns1* has  
434 been shown to localize to focal adhesions and to assist in mediating signaling between  
435 the extracellular matrix and the actin cytoskeleton to impact cell movement and  
436 proliferation (35, 36). Several reports have shown that loss of *Tns1* can cause a  
437 decrease in cell motility in many cell types (46-48), and *Tns1* has also been shown to be  
438 involved in epithelial-mesenchymal transition (EMT) of cancer cells (49). The general  
439 relationship between the expression of *Tns1* and different stages/subtypes of breast  
440 cancer has been unclear. However, Kaplan-Meier survival analysis indicates that the  
441 expression of *Tns1* is increased in grade 3 breast tumors (37) supporting our findings of  
442 a positive role of *Tns1* in breast tumor progression mediated by *MaTAR25*. Although  
443 *Tns1* is the top target of *MaTAR25* with the highest statistical significance we cannot  
444 rule out the possibility that *MaTAR25* also regulates additional genes given the other  
445 candidates identified in our ChIRP-seq analysis. These candidates will be the focus of  
446 future studies.

447

#### 448 ***MaTAR25* partners with purine rich element binding protein B**

449 By performing RNA antisense oligonucleotide pull-downs (RAP) in 4T1 cells  
450 combined with iTRAQ mass spectrometry, to determine the absolute quantitation of  
451 *MaTAR25* associated proteins, we identified a specific interaction between *MaTAR25*  
452 and purine rich element binding protein B (PURB) which appears to be crucial for the

453 downstream regulation of *MaTAR25*. PURB has been reported to be a transcriptional  
454 co-activator and binds to the single strand of the repeated purine-rich element PUR  
455 which is present in promoter regions and as such has been implicated in transcriptional  
456 control. PURB plays different roles in many physiological and pathological processes  
457 (50-52). For example, PURB has been shown to be over-expressed in several different  
458 cancer types (53). In addition, a previous study showed PURB to act as a transcriptional  
459 co-factor that can be recruited by *linc-HOXA1* to mediate its transcriptional regulation in  
460 embryonic stem cells (43) supporting a critical role of PURB with different lincRNAs in  
461 different biological contexts. We identified the *MaTAR25* target region of the *Tns1* gene  
462 to have high ratio of purine and pyrimidine bases (3:1), and our ChIP-qPCR result  
463 indicated a high occupancy capacity of PURB over this targeting region, further  
464 supporting a functional role of PURB in partnering with *MaTAR25* to regulate the *Tns1*  
465 gene. The results of ectopic over-expression or siRNA mediated knockdown of PURB,  
466 resulting in altered expression (upregulation or down-regulation, respectively) of *Tns1* in  
467 4T1 mammary tumor cells indicates a transcriptional regulatory role of PURB in this  
468 context. As the interaction of PURB with *MaTAR25* is essential for PURB binding to  
469 *Tns1* DNA this suggests that *MaTAR25* acts as a chaperone and/or scaffold for the  
470 *MaTAR25/PURB/Tns1* DNA complex, which is critical for transcriptional regulation of  
471 *Tns1* thereby impacting cancer progression.

472 PURB can form a homodimer, a heterodimer with PURA, or a heterotrimer with  
473 PURA and Y-box protein 1 (YBX1). Interestingly, these two additional proteins were  
474 also identified in our MS-iTRAQ analysis of *MaTAR25* interactors, and have been  
475 studied in many cancer types (54-56). Future investigation of these potential

476 interactions may provide further insights into the molecular mechanism of the *MaTAR25*  
477 PURB complex in cancer cells.

478

479 ***LINC01271* is the human ortholog of *MaTAR25***

480         Based upon synteny and further validation we identified *LINC01271* as the  
481 human ortholog of *MaTAR25*. Interestingly, *LINC01271* has been identified as one of 65  
482 new genetic loci that are related to overall breast cancer risk (57). *LINC01271*  
483 expression is increased in breast cancer and correlates with poor clinical outcome  
484 based on the analysis of patient clinical data (44). In addition, our results from  
485 examining sections of breast tumors and corresponding lung metastasis from the same  
486 patients showed a positive correlation between the high expression of *LINC01271* and  
487 breast cancer stage. Our finding of an even higher level of expression in lung  
488 metastases from the same patients was especially interesting. Metastasis is the major  
489 cause of cancer related deaths, particularly in breast cancer patients (58, 59), and  
490 developing an efficient treatment strategy to target and reduce breast cancer metastasis  
491 still remains the key challenge for this disease. Our ability to use ASOs to knockdown  
492 *MaTAR25* in the Her2/neu mouse model resulting in necrotic tumors and a significant  
493 reduction in metastasis has therapeutic implications. ASO targeting as a therapeutic  
494 approach has been applied to many diseases (60-62) including cancer (26, 63, 64) in  
495 recent years. For example, a cEt ASO targeting the transcription factor STAT3 has  
496 shown robust single agent activity in highly treatment-refractory lymphoma and non-  
497 small cell lung cancer studies (64). The STAT3 ASO (AZD9150) has advanced into  
498 multiple Phase I and II clinical trials (NCT01563302, NCT02983578, NCT02549651). In

499 addition, an antisense drug targeting all forms of the androgen receptor for the  
500 treatment of advanced metastatic prostate cancer has entered a clinical trial  
501 (NCT02144051). In this study, we developed three ASOs targeting *LINC01271* for  
502 functional assays *in vitro*. Ultimately, *LINC01271* represents an ideal candidate to be  
503 exploited as a potential prognostic/therapeutic target and *LINC01271* specific ASOs as  
504 therapeutics to impact breast cancer progression and metastasis.

505

## 506 **METHODS**

### 507 **EXPERIMENTAL MODELS**

#### 508 **Cell Culture**

509 Murine 4T1 cells, murine NF639 (MMTV-cNEU) cells, human MDA-MB-231 cells, and  
510 human MDA-MB-231 LM2 cells were cultured in DMEM with 10% FBS, and 1%  
511 penicillin/strptomycin.

512

#### 513 **Organoid Culture**

514 Surgically removed tumor samples from breast cancer patients along with adjacent  
515 normal tissue were collected from Northwell Health in accordance with Institutional  
516 Review Board protocol IRB-03-012 (TAP16-08). Informed consent ensured that the de-  
517 identified materials collected, the models created, and data generated from them can be  
518 shared without exceptions with researchers in the scientific community. Tumor and  
519 normal organoids were developed using a previously published protocol (Sachs et al.,  
520 2018). The tissues were manually cut into smaller pieces and treated with Collagenase  
521 IV at 37°C. The samples were manually broken down by pipetting into smaller

522 fragments and seeded in a dome of matrigel. Organoids were grown in culture media  
523 which contained 10% R-Spondin 1 conditioned media, 5 nM Neuregulin 1, 5 ng/ml  
524 FGF7, 20 ng/ml FGF10, 5 ng/ml EGF, 100 ng/ml Noggin, 500 nM A83-01, 5  $\mu$ M Y-  
525 27632, 1.2  $\mu$ M SB 202190, 1x B27 supplement, 1.25 mM N-Acetyl-cysteine, 5 mM  
526 Nicotinamide, 1x Glutamax, 10 mM Hepes, 100U/ml Penicillin/streptomycin, 50  $\mu$ g/ml  
527 Primocin in 1x Advanced DMEM-F12 (Sachs et al., 2018). Cultures were passaged  
528 every 2-4 weeks using TrypLE<sup>TM</sup> to break down the organoids into smaller clusters of  
529 cells and replating them in Matrigel domes.

530

### 531 **Mice**

532 All animal procedures and studies were approved by the Cold Spring Harbor Laboratory  
533 Animal Use Committee in accordance to IACUC procedures. Briefly, male MMTV-Neu-  
534 NDL mice (FVB/N background) were kindly provided by Dr. William Muller (McGill  
535 University, Canada). Male MMTV-Neu-NDL mice were crossed with wild type FVB/N  
536 female mice purchased from the Jackson Laboratory for breeding. PCR genotyping was  
537 applied to select female mice with heterogeneous genotypes for MMTV-Neu-NDL for  
538 later *in vivo* ASO injection experiments. 4-6 week old BALB/c female mice were  
539 purchased from the Jackson Laboratory for *in vivo* 4T1 cell mammary fat pad (MFP)  
540 injection and tail-vein injection experiments.

541

### 542 **METHODS**

543 **Details of materials and reagents are listed in Supplementary Table S2**

544 **Details of oligonucleotide sequences are listed in Supplementary Table S3**

545

### 546 **5'/3' Rapid Amplification of cDNA Ends (RACE)**

547 5' and 3' RACE of *MaTAR25* transcripts was performed on TRIzol-extracted RNA using  
548 the Ambion FirstChoice RLM-RACE kit according to the manufacturer's instructions.  
549 Briefly, fragments were amplified by nested PCR using AmpliTaq Polymerase. PCR  
550 products were separated on 2% agarose, bands excised, gel purified, sub-cloned into  
551 pGEM-T Easy (Promega) and 4 or more clones per fragment were sequenced using  
552 standard Sanger sequencing. Primer sequences are provided in Table S1.

553

### 554 **Northern Blot Analysis**

555 *MaTAR25*-specific radiolabeled DNA probes were generated using dCTP P32 in a  
556 random primed labeling reaction. Total RNA was extracted by the TRIzol method.  
557 Analysis of RNA expression was performed by following NorthernMax® Kit manual.  
558 Briefly, 20 µg and 30 µg total RNA samples were electrophoresed on a 1% agarose gel  
559 and was transferred to a positively charged nylon membrane (NC). The RNA was then  
560 fixed to the NC membrane using UV crosslinking. The cross-linked membrane was  
561 prehybridized with ultrahyb-oligo hybridization buffer and hybridized with the *MaTAR25*-  
562 specific radiolabeled DNA probe. After washing with SSC wash buffers several times,  
563 the wrapped membrane was exposed to a PhosphorImager screen in a cassette or X  
564 ray film for detecting signals.

565

### 566 **Cell Lysate Preparation for Immunoblot Analysis**



567 Cells were trypsinized, and harvested cell pellets were lysed in RIPA buffer (25 mM  
568 Tris-HCl pH 7.6, 150 mM NaCl, 1% NP-40 substitute, 1% sodium deoxycholate and  
569 0.1% SDS) supplemented with 1X Roche protease inhibitor cocktail. The cell lysate was  
570 incubated on ice for 15 minutes, then sonicated for 5 minutes before centrifugation at  
571 13000xg. The supernatant was collected and quantified using the BCA protein assay.

572

### 573 ***In vitro* Transcription/Translation**

574 T7 promoter containing DNA or plasmids were used in a TNT® Quick Coupled  
575 Transcription/Translation System following the manufacture's protocol. Briefly, 1 µg  
576 Plasmid DNA Template was mixed with 40 µl TNT® T7 Quick Master Mix, 1 µl  
577 Methionine (1 mM), 1 µl Transcend™ Biotin-Lysyl-tRNA, and nuclease free water for the  
578 final volume of 50 µl per reaction. The reaction tube was incubated at 30°C for 90  
579 minutes, and 1 µl reaction product was added into diluted 2x Laemmli sample buffer for  
580 immunoblot analysis. Samples were loaded on 4–20% Mini-PROTEAN® TGX™  
581 Precast Protein Gels, and the signals were detected by Streptavidin-HRP.

582

### 583 **RNA Isolation and Quantitative Real-Time PCR (qRT-PCR) Assays**

584 Total RNA was extracted using TRIzol following the manufacture's protocol. 1 µg total  
585 RNA was treated with DNaseI and reverse transcribed into cDNA using TaqMan  
586 Reverse Transcription Reagent kit, followed by qPCR with SYBR green PCR master  
587 mix on an ABI QuantStudio 6 Flex Real-Time PCR System. qRT-PCR conditions were  
588 as follows: 30 minutes at 50°C for reverse transcription, 15 minutes at 95°C for the initial  
589 activation step followed by 40 cycles of 15 seconds at 94°C, 30 seconds at 60°C.

590 Mouse peptidylprolyl isomerase B (cyclophilin B; PPIB), and human GAPDH and  
591 RPL13A were used as endogenous controls to normalize each sample. A list of primers  
592 used is provided in Table S1.

593

#### 594 **Cell Fractionation, Cytoplasmic/Nucleoplasmic/Chromatin-related RNA Isolation**

595 Cell fractionation was done using a standardized protocol previously described (66).  
596 Briefly, cultured cells were harvested and lysed in NP-40 substitute lysis buffer (10 mM  
597 Tris pH 7.5, 150 mM NaCl, and 0.15% NP-40 substitute). The cell lysate was overlaid  
598 on top of sucrose buffer (10 mM Tris pH7.4, 150 mM NaCl, and 24% sucrose) and  
599 centrifuged at 3500xg for 10 minutes to separate the cytoplasmic fraction and nuclei  
600 pellet. The nuclei pellet was rinsed with PBS-EDTA once, and resuspended in glycerol  
601 buffer (20 mM Tris pH7.4, 75 mM NaCl, 0.5 mM EDTA, and 50% Glycerol) mixed with  
602 Urea buffer (1 M Urea, 0.3 M NaCl, 7.5 mM MgCl<sub>2</sub>, 0.2 mM EDTA, and 1% NP-40  
603 substitute) on ice for 2 minutes. The lysate was centrifuged at 13000xg for 2 minutes to  
604 separate the nucleoplasmic fraction and chromatin pellet. The chromatin later was  
605 resuspended in TRIzol reagent and fully solubilized by passing through the 21-gauge  
606 needle and syringe. The cytoplasmic fraction and nucleoplasmic fraction were also used  
607 for RNA extraction using TRIzol reagent. RNA extracted from different fractions were  
608 applied for cDNA synthesis and qRT-PCR. Primer sequences are provided in Table S1.

609

#### 610 **CRISPR/Cas9 Genetic Knockout**

611 To generate a genetic knockout of *MaTAR25*, two sgRNAs targeting the promoter  
612 region were combined, creating a deletion including the TSS. Both sgRNAs were

613 designed using <http://crispr.mit.edu/>. The sgRNA targeting the gene body of *MaTAR25*  
614 was cloned into a pSpCas9(BB)-2A-GFP vector and the sgRNA targeting the upstream  
615 promoter region was cloned into a pSpCas9(BB)- 2A-mCherry vector. 4T1 cells were  
616 transfected with both plasmids using 4D-Nucleofector X Unit, using program code “CN-  
617 114”. To select for cells expressing both gRNAs, GFP and mCherry double positive  
618 cells were sorted 40 hours post transfection, as single cell deposition into 96-well plates  
619 using a FACS Aria (SORP) Cell Sorter (BD). Each single cell clone was propagated and  
620 analyzed by genomic PCR and qRT-PCR to select for homozygous knockout clones.  
621 Cells transfected with a sgRNA targeting *Renilla* luciferase were used as a negative  
622 control. Sequences for sgRNAs and primers are provided in Table S1.

623

#### 624 **Cell Counting Viability Assay**

625 Cultured cells were harvested and the same number of cells were seeded into each well  
626 of a 12 well tissue culture plate at day 0. Trypan Blue-treated cell suspensions were  
627 collected and applied to a hemocytometer for manual counting at different time points.

628

#### 629 **Cell Cycle Analysis**

630 Cell cycle analysis was performed using BD bromodeoxyuridine (BrdU) FITC assay kit  
631 following the manufacturer’s protocol. Briefly, cultured cells were incubated with BrdU  
632 containing medium for 30 minutes, and FITC conjugated anti-BrdU antibody was  
633 applied for labeling actively synthesizing DNA. 7-aminoactinomycin D (7-AAD) was  
634 used for labeling total DNA. The labeled cell samples were analyzed on the BD LSR II  
635 flow cytometer, and BrdU FITC-A vs DNA 7-AAD dot plot with gates was used to

636 encompass the G0/G1, S, and G2/M populations. The collected cytometry data were  
637 analyzed with FACSDiva™ and FlowJo software.

638

### 639 **Migration Assay**

640 Live cell tracking was performed to examine cell migration. Cultured cells were  
641 harvested and the same number of cells were seeded into 6 wells of a tissue culture  
642 plate at day 0. Images were collected every 5 minutes (5 viewpoints were selected from  
643 each well) using Zeiss AxioObserver microscope for 8 hours, and the images of  
644 individual sample were converted to videos using ImageJ. Videos were analyzed by  
645 CellTracker image processing software. The mean relative migration distance ( $\mu\text{m}$ ) of  
646 three independent replicates of 4T1 control groups and *MaTAR25* KO groups were  
647 calculated.

648

### 649 **Scratch Wound Healing Assay**

650 Cultured cells were harvested and seeded into each well of a 24 well tissue culture  
651 plate. Cells were incubated until they reached at least 90% confluence. The wound line  
652 was created by “scratch” with a p200 micropipette tip, then cells were washed with PBS  
653 twice to remove the debris and then each well was imaged. After 12 hours incubation,  
654 each well was images again and the migration areas in each well was measured by  
655 ImageJ for comparison.

656

### 657 **Invasion Assay**

658 Invasion assays with 4T1 *MaTAR25* knockout cells and 4T1 control cells were carried  
659 out using the Cultrex® 24 well BME Cell Invasion Assay (Trevigen) following the  
660 manufacturer's protocol. Briefly, cells were harvested and seeded at a density of  $1 \times 10^5$   
661 cells/well into the invasion chamber. As a negative control, serum-free medium was  
662 used that did not stimulate cell invasion through the BME. The plate was incubated at  
663 37°C for 24 hours and the assay was performed. The tumor cells that invaded through  
664 the BME layer and attached to the bottom of the invasion chamber were collected using  
665 cell dissociation solution and stained with Calcein AM solution. The fluorescence was  
666 measured with a SpectraMax i3 Multi-Mode Detection Platform (Molecular Devices)  
667 using the 480/520 nm filter set.

668

## 669 **Cloning**

670 Specific gene overexpression plasmids were constructed using NEBuilder HiFi DNA  
671 Assembly following the manufacture's protocol. PCR products were cloned into pCMV6-  
672 entry plasmids digested with Sgf I and Fse I. Assembled plasmids were introduced into  
673 NEB stable competent *E. coli* using heat shock transformation and kanamycin selection.  
674 4 or more colonies per plate were picked and sequenced using standard Sanger  
675 sequencing.

676

## 677 **Antisense Oligonucleotide (ASO) and siRNA-Mediated Knockdown (KD)**

678 Specific 16mer antisense oligonucleotides (ASOs) comprised of phosphorothioate-  
679 modified short S-cEt (S-2' -O-Et-2',4' -bridged nucleic acid) gapmer chemistry  
680 targeting *MaTAR25* and *LINC01271* were designed and provided by Ionis

681 Pharmaceuticals, Inc. Briefly, cultured cells were harvested and seeded into culture  
682 dishes. Transfection-free uptake of ASOs was accomplished by adding 4  $\mu$ M of either  
683 *MaTAR25/LINC01271*-specific ASOs or scrambled ASO (scASO) to the culture medium  
684 immediately after seeding the cells. Cells were incubated for indicated time points and  
685 RNA was isolated using TRIzol reagent for qRT-PCR to check the knockdown  
686 efficiency. For siRNA mediated knockdown, siRNAs (27mers) targeting mouse PURB  
687 were purchased from ORIGENE, and siRNA transfection was done using Lipofectamine  
688 2000 following the manufacture's protocol. RNA was extracted at different time points  
689 for qRT-PCR to check the knockdown efficiency. ASO sequences and primer  
690 sequences are provided in Table S1.

691

#### 692 **Chromatin Isolation by RNA purification (ChIRP)-Seq**

693 For Chromatin Isolation by RNA purification (ChIRP), we followed a previously  
694 described protocol (34). Briefly, 20 million cells were harvested and fixed in 1%  
695 glutaraldehyde solution for each reaction. ChIRP was performed using biotinylated oligo  
696 probes designed against mouse *MaTAR25* using the ChIRP probe designer (Biosearch  
697 Technologies). Independent even and odd probe pools were used to ensure lncRNA-  
698 specific retrieval (refer to Table S1 for odd and even sequences targeting  
699 *MaTAR25*, and probes targeting mouse PPIB transcripts which were used as negative  
700 controls). ChIRP-Seq libraries were constructed using the Illumina TruSeq ChIP Library  
701 Preparation Kit. Sequencing libraries were barcoded using TruSeq adapters and  
702 sequenced on Illumina NextSeq instruments.

703

## 704 **ChIRP-Seq Data analysis**

705 Data quality was assessed using FastQC  
706 (<http://www.bioinformatics.babraham.ac.uk/projects/fastqc/>) and paired-end reads were  
707 mapped to GRCm38 using Bowtie2 (67) with parameters --end-to-end --sensitive --fr,  
708 resulting in a 90% or higher overall alignment rate. ChIRP seq analysis was performed  
709 using HOMER (65). Differential ChIRP peaks were called using the  
710 `getDifferentialPeaksReplicates.pl` script, with negative control (PPIB) pull-down samples  
711 as background and parameters `-style histone -f 50`. Peaks identified with at least a 50-  
712 fold enrichment were processed further using the `annotatePeaks.pl` script and the  
713 GENCODE vM16 annotation. Both known and *de novo* motif analysis was carried out  
714 with the `findMotifsGenome.pl` script on the repeat-masked GRCm38 genome, +/- 500 bp  
715 around the identified ChIRP peaks.

716

## 717 **RNA-seq Library Construction**

718 RNA was extracted using TRIzol following the manufacture's protocol. RNA quality was  
719 assayed by running an RNA 6000 Nano chip on a 2100 Bioanalyzer. 1 µg total RNA  
720 was used for constructing each RNA-seq library using the Illumina TruSeq sample prep  
721 kit v2 following the manufacture's protocol. Briefly, RNA was polyA selected and  
722 enzymatically fragmented. cDNA was synthesized using Super Script II master mix,  
723 followed by end repair, A-tailing and PCR amplification. Each library was high-  
724 throughput single-end sequenced on Illumina NextSeq instruments.

725 .

726

## 727 **RNA-Seq Data analysis**

728 Data was analyzed as previously described (29). Briefly, the quality of FASTQ files was  
729 assessed using FastQC (<http://www.bioinformatics.babraham.ac.uk/projects/fastqc/>).  
730 Reads were mapped to GRCm38 using STAR (68), and the reads per gene record were  
731 counted using HTSeq-count (69) and the GENCODE vM5 annotation. Differential gene  
732 expression was performed with DESeq2 (70), and an adjusted p-value of < 0.05 was set  
733 as threshold for statistical significance. KEGG pathway and GO term enrichment and  
734 was carried out using the R/Bioconductor packages GAGE (71) and Pathview (72).

735

## 736 **RNA Antisense Pulldown and Mass Spectrometry**

737 Cells were lysed in a 10 cm culture dish in 1 ml IP lysis buffer (IPLB, 25 mM Tris-HCl pH  
738 7.4, 150 mM NaCl, 1% NP-40, 1 mM EDTA, 5% glycerol, supplemented with 100 U/ml  
739 SUPERase-IN and 1X Roche protease inhibitor cocktail) for 10 minutes, and lysate was  
740 centrifuged at 13,000xg for 10 minutes. Cell lysate was adjusted to 0.3 mg/ml (Pierce  
741 BCA Protein Assay). A total of 100 pmol of biotinylated oligo was added to 500 µl of  
742 lysate and incubated at room temperature for 1 hour with rotation. 100 µl streptavidin  
743 Dynabeads were washed in IPLB, added to the lysate, and incubated for 30 minutes at  
744 room temperature with rotation. Beads were washed three times with 1 ml lysis buffer.  
745 For determining temperature for optimal elution, beads were then resuspended in 240 µl  
746 of 100 mM TEAB and aliquoted into eight PCR tubes. Temperature was set on a veriflex  
747 PCR block and incubated for 10 minutes. Beads were captured and TRIzol was added  
748 to the eluate and beads. Once optimal temperature is established, the beads were  
749 resuspended in 90 µl of 100 mM TEAB, and incubated at 50° C for 10 minutes. TRIzol



750 was added to 30  $\mu$ l of the eluate, another 30  $\mu$ l was kept for immunoblots, and the last  
751 30  $\mu$ l aliquot was sent directly to the Cold Spring Harbor Laboratory Mass Spectrometry  
752 Shared Resource for analysis.

753

754

755

### 756 **RNA Immunoprecipitation (RIP)**

757 RIP was performed following RIP the Abcam protocol with minor modifications. Briefly,  
758 cultured cells were harvested and 40 million cells were washed once with cold PBS,  
759 then the cells were resuspended in 8 ml PBS, 8 ml nuclear isolation buffer (1.28 M  
760 sucrose, 40 mM Tris-HCl pH 7.5, 20 mM MgCl<sub>2</sub>, and 4% Triton X-100 supplemented  
761 with 100 U/ml SUPERase-IN and 1X Roche protease inhibitor cocktail), and 24 ml  
762 nuclease free water on ice for 20 min with frequent mixing. The cleared lysates were  
763 pelleted by centrifugation at 2,500xg for 15 min. Pellets resuspended in 4 ml RIP buffer  
764 (150 mM KCl, 25 mM Tris pH 7.4, 5 mM EDTA, 0.5 mM DTT, and 0.5% NP40 substitute  
765 supplemented with 100 U/ml SUPERase-IN and 1X Roche protease inhibitor cocktail)  
766 and sonicated for 5 minutes using BioRuptor Pico water bath sonicator (30 s ON/OFF)  
767 at 4°C. The lysates were cleaned by centrifugation at 13,000 rpm for 10 minutes. The  
768 supernatant was collected and separated, then incubated with 4  $\mu$ g PURB antibody or  
769 rabbit isotype IgG control for 2 hours to overnight at 4°C with gentle rotation. 80  $\mu$ l of  
770 protein A beads for rabbit antibody then added into the reactions and incubate for 1  
771 hour at 4°C with gentle rotation. After washing three times with RIP buffer and once with

772 PBS, beads were collected for immunoblot analysis and RNA extraction for qRT-PCR.

773 Primers for RIP qRT-PCR can be found in Table S1.

774

775 **Chromatin Immunoprecipitation (ChIP) coupled with quantitative PCR (ChIP-**  
776 **qPCR)**

777 For Chromatin Immunoprecipitation (ChIP) we followed protocols previously described  
778 (73). Briefly, 30 million 4T1 cells were harvested and crosslinked in 1% formaldehyde at  
779 room temperature for 20 minutes, then the reaction was quenched using 0.125 M  
780 glycine. Cells were incubated with cell lysis buffer (10 mM Tris pH8.0, 10 mM NaCl,  
781 0.2% NP-40 substitute) and then resuspended and sonicated in 1.5 ml of nuclei lysis  
782 buffer (50 mM Tris pH8.0, 10 mM EDTA, 1% SDS) for 15 min using BioRuptor Pico  
783 water bath sonicator (30 s ON/OFF) at 4°C. For one IP, 1.5 ml of sonicated chromatin  
784 from 30 million cells were diluted with 21 ml IP-Dilution buffer (20 mM Tris pH 8.0, 2 mM  
785 EDTA, 150 mM NaCl, 1% Triton X-100, 0.01% SDS,) and incubated with 4 µg of PURB  
786 antibody or rabbit isotype IgG control, and 80 µl of protein A beads for rabbit antibody at  
787 4°C overnight. After washing once with IP-wash 1 buffer (20 mM Tris pH8.0, 2 mM  
788 EDTA, 50 mM NaCl, 1% Triton X-100, 0.1% SDS), twice with High-salt buffer (20 mM  
789 Tris pH 8.0, 2 mM EDTA, 500 mM NaCl, 1% Triton X-100, 0.01% SDS), once with IP-  
790 wash 2 buffer (10 mM Tris pH 8.0, 1 mM EDTA 0.25 M LiCl, 1% NP-40 substitute, 1%  
791 sodium deoxycholate), twice with TE buffer (10 mM Tris-Cl, 1 mM EDTA, pH 8.0),  
792 beads bound chromatin were eluted in 800 µl nuclei lysis buffer by heating at 65 °C for  
793 15 minutes. 48 µl of 5 M NaCl was added to the 800 µl eluted chromatin, followed by  
794 incubation at 65°C overnight for reverse cross-linking. After reverse cross-linking, DNA

795 was treated with RNaseA and proteinase K, followed by purification using QIAGEN PCR  
796 purification kit. qPCR was performed on ABI QuantStudio 6 Flex Real-Time PCR  
797 System. CHIP-qPCR primers can be found in Table S1.

798

### 799 **Single Molecule RNA Fluorescence In Situ Hybridization (FISH)**

800 For single-molecule RNA FISH, custom Type-6 primary probes targeting *MaTAR25*,  
801 *LINC01271* and other lncRNAs were designed and synthesized by Affymetrix. For RNA-  
802 FISH on cultured cell samples, Affymetrix View ISH Cell Assay Kit reagents were used.  
803 Cultured cells were harvested and seeded onto acid-cleaned #1.5 glass coverslips for  
804 24 hours incubation to 70% confluence, cell samples then were fixed in freshly-prepared  
805 4% paraformaldehyde (PFA). Cells were then permeabilized and protease digested  
806 before hybridization. For RNA-FISH on formalin-fixed paraffin-embedded (FFPE) tissue  
807 sections of breast tumors and metastases, Affymetrix ViewRNA ISH Tissue 1-Plex  
808 Assay kit reagents were applied. Sections on slides were deparaffinized, protease  
809 digested, and fixed with 10% NBF before hybridization. QuantiGene ViewRNA probe  
810 hybridizations were performed at 40°C for 3 hours. The hybridization and signal  
811 amplification steps were performed according to the manufacturer's instructions, and  
812 nuclei were counter-stained with DAPI. Coverslips and tissue sections were mounted in  
813 ProLong Gold Antifade mounting medium before detection. Imaging was performed on  
814 Zeiss LSM 710/780 Confocal Microscope systems.

815

### 816 **DNA FISH**

817 Different mouse BAC clones (RPCI-23) were used as template included (*MaTAR25*),  
818 and (*Tensin1*). 1 µg BAC DNA was used as template for random priming reaction to  
819 generate amine-modified DNA, and amine-modified DNA was labelled with a reactive  
820 fluorescent dye as fluorescent probes according to the protocol provided with ARES™  
821 Alexa Fluor™ DNA Labeling Kit. For DNA FISH, we followed protocols previously  
822 described (Hogan et al., 2015). Briefly, cultured cells were seeded onto 22mm<sup>2</sup> glass  
823 coverslips (Corning), and coverslips were fixed with freshly prepared 4% PFA for 20  
824 minutes at room temperature, and permeablized in 0.5% Triton X-100/1X PBS for 5  
825 minutes on ice. Probes were prepared for hybridization by mixing 2µl probe with 5µl  
826 each of sheared salmon sperm DNA, mouse Cot1 DNA, and yeast tRNA, dehydrating  
827 the probe mixture in the speed-vac, and then resuspending the probe in 10µl deionized  
828 formamide (Ambion). Just prior to hybridization, the probes were denatured at 95°C for  
829 10 minutes, transferred to ice for 5 minutes, and then mixed with 10µl 2X Hybridization  
830 Buffer (4X SSC, 20% dextran sulfate) and pipetted onto slides so that coverslips could  
831 be placed cell-side-down on the probe mixture for the hybridization reaction. After  
832 several washes, nuclei were counter-stained with DAPI. Coverslips were mounted in  
833 ProLong Gold Antifade mounting medium before detection. Coverslips were imaged  
834 using Zeiss LSM 710/780 Confocal Microscope systems.

835

### 836 **Immunofluorescence (IF)**

837 For IF, we followed protocols previously described with minor modifications depended  
838 on applied antibody (74). Briefly, cultured cells were harvested and seeded onto acid-  
839 cleaned #1.5 glass coverslips for 24 hours incubation to 70% confluence, cell samples

840 then were fixed in 4% formaldehyde for 20 minutes. Samples were permeabilized in  
841 0.2% Triton X-100 plus 1% Bovine Serum Albumin (BSA) in PBS for 5 minutes on ice.  
842 After incubated in 1% Bovine Serum Albumin (BSA) in PBS for 30 minutes blocking,  
843 samples were incubated in the appropriate concentration (1:50-1:200 followed by  
844 manufacturer's recommendations) of primary antibody for 1-2 hours at room  
845 temperature, and incubated in diluted secondary antibody solution (Alexa 594  
846 conjugated) with phalloidin (Alexa 488 conjugated) for 1 hour in a humidified chamber at  
847 room temperature. After several washes, nuclei were counter-stained with DAPI.  
848 Coverslips were mounted in ProLong Gold Antifade mounting medium before detection.  
849 Coverslips were imaged on the Zeiss LSM 710/780 Confocal Microscope systems.

850

851

## 852 **Transmission Electron Microscopy (TEM)**

853 Cultured cells were harvested and seeded onto 10 cm culture dishes for 24 hours, and  
854 fixed with 2.5% glutaraldehyde (EM grade) in 0.1 M phosphate buffer pH 7.4 at room  
855 temperature for 1 hour. The fixed cells were collected by using a cell scraper, washed  
856 several times in 0.1M phosphate buffer and post fixed in 1% Osmium tetroxide.  
857 Samples were dehydrated in ethanol (30%, 50%, 70%, 80%, 95%, and 100%),  
858 embedding in EMbed 812 Resin and polymerized. 70-90 nm sections were cut on a  
859 Reichert-Jung ultramicrotome using a diamond knife (DiATOME). Sections were  
860 collected on copper grids, stained with UranylLess and lead citrate and imaged with a  
861 Hitachi H-7000 TEM.

862

### 863 ***In Vivo* Mouse Model ASO Injection**

864 Three month old MMTV-Neu-NDL mice were divided into three cohorts (7-12 mice  
865 each), and each mouse in the cohort received either scASO or *MaTAR25* specific ASO1  
866 or ASO2 via subcutaneous injection 50mg/kg/day twice per week. The injections were  
867 carried out for a period of 7 weeks, upon which at least one tumor from most of the  
868 control mice reached 2 cm in size. During the course of treatment, tumors were  
869 measured twice per week. At the end of the treatment period the animals were  
870 euthanized and the primary tumors, lungs, livers, spleens, and intestines were collected.  
871 Collected lungs were fixed in 4% paraformaldehyde and incubated in 20-30% sucrose  
872 solution overnight, then frozen in OCT solution. The lung OCT blocks were cross-  
873 sectioned 2 mm apart, and the lung sections were embedded horizontally to obtain  
874 serial sections of the entire lung. Other tissues were cut into two pieces. One parts of  
875 each issue was snap frozen using liquid nitrogen for further RNA extraction. The  
876 remaining tissues were fixed in 4% paraformaldehyde and paraffin embedded, then  
877 formalin-fixed, paraffin embeeded (FFPE) tissue blocks were sectioned. All sections  
878 were stained with Hematoxlin and Eosin (H&E) following standard protocol, and slides  
879 were scanned and analyzed using an Aperio ImageScope pathology slide viewing  
880 system. All samples were processed and stained at the Cold Spring Harbor Laboratory  
881 Histology Shared Resource.

882

### 883 ***In Vivo* 4T1 Cells Injection**

884 5-6 week old female BALB/c mice and 4T1 cells (control and *MaTAR25* KO cells)  
885 expressing luciferase were used for 4T1 mammary fat pad and tail-vein injection

886 experiments. For mammary fat pad injection,  $1 \times 10^5$  4T1 control or *MaTAR25* KO cells  
887 were injected orthotopically into the mammary fat pad of female BALB/c mice. Mice  
888 were monitored and primary tumors were measured every week. Mice were sacrificed  
889 and tumors were collected at day 28 to compare the tumor growth rate between 4T1  
890 control groups and *MaTAR25* KO groups.

891 For tail-vein injection, female BALB/c mice were injected intravenously with  $1 \times 10^5$  4T1  
892 control or *MaTAR25* KO cells in the tail vein. Mice were monitored every week and  
893 sacrificed at day 21. The mouse lungs were collected and imaged, and lung metastatic  
894 nodules were counted to compare the metastatic ability between 4T1 control groups  
895 and *MaTAR25* KO groups.

896

## 897 **QUANTIFICATION AND STATISTICAL ANALYSIS**

898 Statistics tests were performed and analysed using Microsoft Excel and GraphPad  
899 Prism 7.0. p value was calculated by paired Student's t-test, two-tailed. Significance  
900 was defined as  $p < 0.05$ .

901

## 902 **DATA AND SOFTWARE AVAILABILITY**

903 The accession number for the RNA-seq and ChIRP-seq data reported in this study is  
904 GEO: GSE142169

905

906

## 907 **Disclosure of Potential Conflicts of Interest**

908 D.L.Spector is a consultant to, and receives research support from, Ionis  
909 Pharmaceuticals.

910

911 **Authors' Contributions:**

912 **Conception and design:** K.Chang and D.L. Spector

913 **Analysis of the RNA-seq, ChIRP-seq, and TCGA human BC patient data:** S.D.

914 Diermeier

915 **Cell cycle analysis, and technical support of CRISPR mediated KO and RNA**

916 **antisense pulldown:** A.T. Yu

917 **Tissue RNA-FISH:** L.D. Brine

918 **Technical support (*in vivo* mouse model ASO injections and 4T1 mammary fat**

919 **pad injections):** S. Russo

920 **Human organoid culture and organoid RNA extraction:** S. Bhatia.

921 **TEM sample preparation and imaging:** H. Alsudani

922 **Material support (i.e., human BC patient samples for organoid culture and FFPE**

923 **slides):** K. Kostroff, T. Bhuiya, E. Brogi

924 **Material support (designing and providing ASOs for *in vitro* and *in vivo***

925 **experiments):** C. F. Bennett, F. Rigo

926 **Writing of the manuscript:** K.Chang and D.L. Spector

927 **Study supervision:** D.L. Spector

928

929 **Acknowledgments**



930 We thank members of the Spector lab for critical discussions and advice  
931 throughout the course of this study. We also acknowledge Dr. J. Erby Wilkinson  
932 (University of Michigan Medical School) for help with pathology and histology analysis.  
933 We thank Dr. William Muller (McGill University, Montreal) for providing MMTV-Neu-NDL  
934 mice, Dr. Mikala Egeblad (CSHL) for providing MMTV-PyMT mice, Dr. Fred R. Miller  
935 (Wayne State University) for providing 4T1 cells, Dr. Nicholas Tonks for providing  
936 SKBR3 and BT-474 cells, Dr. Joan Massagué (Sloan Kettering Institute) for providing  
937 MDA-MB-231 LM2 cells, Dr. Bruce Stillman (CSHL) for providing the pET3a-Xenopus  
938 laevis histone H2B plasmid, and Dr. Scott Lyons (CSHL) for providing Ef1 $\alpha$ -Luc2-  
939 mStrawberry plasmid. We would also like to thank the CSHL Cancer Center Shared  
940 Resources (Microscopy, Flow Cytometry, Animal, Histology, and Next-Gen Sequencing)  
941 for services and technical expertise (NCI 2P3OCA45508). This research was supported  
942 by NCI 5P01CA013106-Project 3 (D.L.S.), Susan G. Komen postdoctoral fellowship  
943 (S.D.D.) and NCI 1K99CA215362 (S.D.D.), CSHL/Northwell Health (D.L.S.), and  
944 Manhasset Woman's Coalition Against Breast Cancer (S.B.).

945

## 946 REFERENCES

- 947 1. Siegel RL, Miller KD, Jemal A. Cancer statistics, 2019. *CA Cancer J Clin* 2019;69:7-  
948 34.
- 949 2. Li CI, Uribe DJ, Daling JR. Clinical characteristics of different histologic types of  
950 breast cancer. *Br J Cancer* 2005;93:1046-52.
- 951 3. Malhotra GK, Zhao X, Band H, Band V. Histological, molecular and functional  
952 subtypes of breast cancers. *Cancer Biol Ther* 2010;10:955-60.

- 953 4. Curtis C, Shah SP, Chin SF, Turashvili G, Rueda OM, Dunning MJ, et al. The  
954 genomic and transcriptomic architecture of 2,000 breast tumours reveals novel  
955 subgroups. *Nature* 2012;486:346-52.
- 956 5. Perou CM, Sorlie T, Eisen MB, van de Rijn M, Jeffrey SS, Rees CA, et al. Molecular  
957 portraits of human breast tumours. *Nature* 2000;406:747-52.
- 958 6. Wallden B, Storhoff J, Nielsen T, Dowidar N, Schaper C, Ferree S, et al.  
959 Development and verification of the PAM50-based Prosigna breast cancer gene  
960 signature assay. *BMC Med Genomics* 2015;8:54.
- 961 7. Eroles P, Bosch A, Perez-Fidalgo JA, Lluch A. Molecular biology in breast cancer:  
962 intrinsic subtypes and signaling pathways. *Cancer Treat Rev* 2012;38(6):698-707.
- 963 8. Derrien T, Johnson R, Bussotti G, Tanzer A, Djebali S, Tilgner H, et al. The  
964 GENCODE v7 catalog of human long noncoding RNAs: analysis of their gene  
965 structure, evolution, and expression. *Genome Res* 2012;22:1775-89.
- 966 9. Djebali S, Davis CA, Merkel A, Dobin A, Lassmann T, Mortazavi A, et al. Landscape  
967 of transcription in human cells. *Nature* 2012;489:101-8.
- 968 10. Guttman M, Amit I, Garber M, French C, Lin MF, Feldser D, et al. Chromatin  
969 signature reveals over a thousand highly conserved large non-coding RNAs in  
970 mammals. *Nature* 2009;458:223-7.
- 971 11. Wilusz JE, Sunwoo H, Spector DL. Long noncoding RNAs: functional surprises from  
972 the RNA world. *Genes Dev* 2009;23:1494-504.
- 973 12. Bergmann JH, Spector DL. Long non-coding RNAs: modulators of nuclear structure  
974 and function. *Curr Opin Cell Biol* 2014;26:10-8.

- 975 13. Ulitsky I, Bartel DP. lincRNAs: genomics, evolution, and mechanisms. *Cell*  
976 2013;154:26-46.
- 977 14. Mercer TR, Dinger ME, Sunkin SM, Mehler MF, Mattick JS. Specific expression of  
978 long noncoding RNAs in the mouse brain. *Proc Natl Acad Sci U S A* 2008;105:716-  
979 21.
- 980 15. Hu W, Yuan B, Flygare J, Lodish HF. Long noncoding RNA-mediated anti-apoptotic  
981 activity in murine erythroid terminal differentiation. *Genes Dev* 2011;25:2573-8.
- 982 16. Amodio N, Raimondi L, Juli G, Stamato MA, Caracciolo D, Tagliaferri P, et al.  
983 MALAT1: a druggable long non-coding RNA for targeted anti-cancer approaches. *J*  
984 *Hematol Oncol* 2018;11:63.
- 985 17. Arun G, Diermeier SD, Spector DL. Therapeutic Targeting of Long Non-Coding  
986 RNAs in Cancer. *Trends Mol Med* 2018;24:257-77.
- 987 18. Fatica A, Bozzoni I. Long non-coding RNAs: new players in cell differentiation and  
988 development. *Nat Rev Genet* 2014;15:7-21.
- 989 19. Morlando M, Fatica A. Alteration of Epigenetic Regulation by Long Noncoding RNAs  
990 in Cancer. *Int J Mol Sci* 2018;19.
- 991 20. Sun M, Nie FQ, Wang ZX, De W. Involvement of lncRNA dysregulation in gastric  
992 cancer. *Histol Histopathol* 2016;31:33-9.
- 993 21. Tian T, Wang M, Lin S, Guo Y, Dai Z, Liu K, et al. The Impact of lncRNA  
994 Dysregulation on Clinicopathology and Survival of Breast Cancer: A Systematic  
995 Review and Meta-analysis. *Mol Ther Nucleic Acids* 2018;12:359-69.
- 996 22. Zhang H, Chen Z, Wang X, Huang Z, He Z, Chen Y. Long non-coding RNA: a new  
997 player in cancer. *J Hematol Oncol* 2013;6:37.

- 998 23. Gupta RA, Shah N, Wang KC, Kim J, Horlings HM, Wong DJ, et al. Long non-coding  
999 RNA HOTAIR reprograms chromatin state to promote cancer metastasis. *Nature*  
1000 2010;464:1071-6.
- 1001 24. Godinho M, Meijer D, Setyono-Han B, Dorssers LC, van Agthoven T.  
1002 Characterization of BCAR4, a novel oncogene causing endocrine resistance in  
1003 human breast cancer cells. *J Cell Physiol* 2011;226:1741-9.
- 1004 25. Xing Z, Park PK, Lin C, Yang L. LncRNA BCAR4 wires up signaling transduction in  
1005 breast cancer. *RNA Biol* 2015;12:681-9.
- 1006 26. Arun G, Diermeier S, Akerman M, Chang KC, Wilkinson JE, Hearn S, et al.  
1007 Differentiation of mammary tumors and reduction in metastasis upon Malat1 lncRNA  
1008 loss. *Genes Dev* 2016;30:34-51.
- 1009 27. Tseng YY, Moriarity BS, Gong W, Akiyama R, Tiwari A, Kawakami H, et al. PVT1  
1010 dependence in cancer with MYC copy-number increase. *Nature* 2014;512:82-6.
- 1011 28. Liu B, Sun L, Liu Q, Gong C, Yao Y, Lv X, et al. A cytoplasmic NF-kappaB  
1012 interacting long noncoding RNA blocks IkappaB phosphorylation and suppresses  
1013 breast cancer metastasis. *Cancer Cell* 2015;27:370-81.
- 1014 29. Diermeier SD, Chang KC, Freier SM, Song J, El Demerdash O, Krasnitz A, et al.  
1015 Mammary Tumor-Associated RNAs Impact Tumor Cell Proliferation, Invasion, and  
1016 Migration. *Cell Rep* 2016;17:261-74.
- 1017 30. Petryszak R, Keays M, Tang YA, Fonseca NA, Barrera E, Burdett T, et al.  
1018 Expression Atlas update--an integrated database of gene and protein expression in  
1019 humans, animals and plants. *Nucleic Acids Res* 2016;44:D746-52.

- 1020 31. Murray S, Ittig D, Koller E, Berdeja A, Chappell A, Prakash TP, et al. TricycloDNA-  
1021 modified oligo-2'-deoxyribonucleotides reduce scavenger receptor B1 mRNA in  
1022 hepatic and extra-hepatic tissues--a comparative study of oligonucleotide length,  
1023 design and chemistry. *Nucleic Acids Res* 2012;40:6135-43.
- 1024 32. Seth PP, Siwkowski A, Allerson CR, Vasquez G, Lee S, Prakash TP, et al. Short  
1025 antisense oligonucleotides with novel 2'-4' conformationally restricted nucleoside  
1026 analogues show improved potency without increased toxicity in animals. *J Med*  
1027 *Chem* 2009;52:10-3.
- 1028 33. Teplova M, Minasov G, Tereshko V, Inamati GB, Cook PD, Manoharan M, et al.  
1029 Crystal structure and improved antisense properties of 2'-O-(2-methoxyethyl)-RNA.  
1030 *Nat Struct Biol* 1999;6:535-9.
- 1031 34. Chu C, Qu K, Zhong FL, Artandi SE, Chang HY. Genomic maps of long noncoding  
1032 RNA occupancy reveal principles of RNA-chromatin interactions. *Mol Cell*  
1033 2011;44:667-78.
- 1034 35. Chen H, Ishii A, Wong WK, Chen LB, Lo SH. Molecular characterization of human  
1035 tensin. *Biochem J* 2000;351 Pt 2:403-11.
- 1036
- 1037 36. Hall EH, Daugherty AE, Choi CK, Horwitz AF, Brautigan DL. Tensin1 requires  
1038 protein phosphatase-1alpha in addition to RhoGAP DLC-1 to control cell polarization,  
1039 migration, and invasion. *J Biol Chem* 2009;284:34713-22.
- 1040 37. Gyorffy B, Lanczky A, Eklund AC, Denkert C, Budczies J, Li Q, et al. An online  
1041 survival analysis tool to rapidly assess the effect of 22,277 genes on breast cancer

- 1042 prognosis using microarray data of 1,809 patients. *Breast Cancer Res Treat*  
1043 2010;123:725-31.
- 1044 38. Mouneimne G, Brugge JS. Tensins: a new switch in cell migration. *Dev Cell*  
1045 2007;13:317-9.
- 1046 39. Parsons JT, Horwitz AR, Schwartz MA. Cell adhesion: integrating cytoskeletal  
1047 dynamics and cellular tension. *Nat Rev Mol Cell Biol* 2010;11:633-43.
- 1048 40. Balas MM, Johnson AM. Exploring the mechanisms behind long noncoding RNAs  
1049 and cancer. *Noncoding RNA Res* 2018;3:108-17.
- 1050 41. Johnson EM, Daniel DC, Gordon J. The pur protein family: genetic and structural  
1051 features in development and disease. *J Cell Physiol* 2013;228:930-7.
- 1052 42. Lasham A, Lindridge E, Rudert F, Onrust R, Watson J. Regulation of the human fas  
1053 promoter by YB-1, Puralpha and AP-1 transcription factors. *Gene* 2000;252:1-13.
- 1054 43. Maamar H, Cabili MN, Rinn J, Raj A. linc-HOXA1 is a noncoding RNA that represses  
1055 Hoxa1 transcription in cis. *Genes Dev* 2013;27:1260-71.
- 1056 44. Minn AJ, Gupta GP, Siegel PM, Bos PD, Shu W, Giri DD, et al. Genes that mediate  
1057 breast cancer metastasis to lung. *Nature* 2005;436:518-24.
- 1058 45. Li J, Han L, Roebuck P, Diao L, Liu L, Yuan Y, et al. TANRIC: An Interactive Open  
1059 Platform to Explore the Function of lncRNAs in Cancer. *Cancer Res* 2015;75:3728-  
1060 37.
- 1061 46. Bernau K, Torr EE, Evans MD, Aoki JK, Ngam CR, Sandbo N. Tensin 1 Is Essential  
1062 for Myofibroblast Differentiation and Extracellular Matrix Formation. *Am J Respir Cell*  
1063 *Mol Biol* 2017;56:465-76.

- 1064 47. Chen H, Duncan IC, Bozorgchami H, Lo SH. Tensin1 and a previously  
1065 undocumented family member, tensin2, positively regulate cell migration. Proc Natl  
1066 Acad Sci U S A 2002;99:733-8.
- 1067 48. Saintigny G, Bernard FX, Juchaux F, Pedretti N, Mahe C. Reduced expression of  
1068 the adhesion protein tensin1 in cultured human dermal fibroblasts affects collagen  
1069 gel contraction. Exp Dermatol 2008;17:788-9.
- 1070 49. Okayama A, Miyagi Y, Oshita F, Ito H, Nakayama H, Nishi M, et al. Identification of  
1071 Tyrosine-Phosphorylated Proteins Upregulated during Epithelial-Mesenchymal  
1072 Transition Induced with TGF-beta. J Proteome Res 2015;14:4127-36.
- 1073 50. Becker C, Wirtz S, Ma X, Blessing M, Galle PR, Neurath MF. Regulation of IL-12  
1074 p40 promoter activity in primary human monocytes: roles of NF-kappaB,  
1075 CCAAT/enhancer-binding protein beta, and PU.1 and identification of a novel  
1076 repressor element (GA-12) that responds to IL-4 and prostaglandin E(2). J Immunol  
1077 2001;167:2608-18.
- 1078 51. Johnson EM. The Pur protein family: clues to function from recent studies on cancer  
1079 and AIDS. Anticancer Res 2003;23:2093-100.
- 1080 52. Kelm RJ, Jr., Lamba GS, Levis JE, Holmes CE. Characterization of purine-rich  
1081 element binding protein B as a novel biomarker in acute myelogenous leukemia  
1082 prognostication. J Cell Biochem 2018;119:2073-83.
- 1083 53. Shi J, Cheng C, Ma J, Liew CC, Geng X. Gene expression signature for detection of  
1084 gastric cancer in peripheral blood. Oncol Lett 2018;15:9802-10.

- 1085 54. Murugesan SN, Yadav BS, Maurya PK, Chaudhary A, Singh S, Mani A. Expression  
1086 and network analysis of YBX1 interactors for identification of new drug targets in  
1087 lung adenocarcinoma. *J Genomics* 2018;6:103-12.
- 1088 55. Shibata T, Tokunaga E, Hattori S, Watari K, Murakami Y, Yamashita N, et al. Y-box  
1089 binding protein YBX1 and its correlated genes as biomarkers for poor outcomes in  
1090 patients with breast cancer. *Oncotarget* 2018;9:37216-28.
- 1091 56. Wang LG, Johnson EM, Kinoshita Y, Babb JS, Buckley MT, Liebes LF, et al.  
1092 Androgen receptor overexpression in prostate cancer linked to Pur alpha loss from a  
1093 novel repressor complex. *Cancer Res* 2008;68:2678-88.
- 1094 57. Michailidou K, Lindstrom S, Dennis J, Beesley J, Hui S, Kar S, et al. Association  
1095 analysis identifies 65 new breast cancer risk loci. *Nature* 2017;551:92-4.
- 1096 58. Gupta GP, Massague J. Cancer metastasis: building a framework. *Cell*  
1097 2006;127:679-95.
- 1098 59. Jin X, Mu P. Targeting Breast Cancer Metastasis. *Breast Cancer (Auckl)* 2015;9:23-  
1099 34.
- 1100 60. Hua Y, Sahashi K, Rigo F, Hung G, Horev G, Bennett CF, et al. Peripheral SMN  
1101 restoration is essential for long-term rescue of a severe spinal muscular atrophy  
1102 mouse model. *Nature* 2011;478:123-6.
- 1103 61. Pandey SK, Wheeler TM, Justice SL, Kim A, Younis HS, Gattis D, et al. Identification  
1104 and characterization of modified antisense oligonucleotides targeting DMPK in mice  
1105 and nonhuman primates for the treatment of myotonic dystrophy type 1. *J*  
1106 *Pharmacol Exp Ther* 2015;355:329-40.



- 1107 62. Wheeler TM, Leger AJ, Pandey SK, MacLeod AR, Nakamori M, Cheng SH, et al.  
1108 Targeting nuclear RNA for in vivo correction of myotonic dystrophy. *Nature*  
1109 2012;488:111-5.
- 1110 63. Bennett CF, Baker BF, Pham N, Swayze E, Geary RS. Pharmacology of Antisense  
1111 Drugs. *Annu Rev Pharmacol Toxicol* 2017;57:81-105.
- 1112 64. Hong D, Kurzrock R, Kim Y, Woessner R, Younes A, Nemunaitis J, et al. AZD9150,  
1113 a next-generation antisense oligonucleotide inhibitor of STAT3 with early evidence of  
1114 clinical activity in lymphoma and lung cancer. *Sci Transl Med* 2015;7:314ra185.
- 1115 65. Heinz S, Benner C, Spann N, Bertolino E, Lin YC, Laslo P, et al. Simple  
1116 combinations of lineage-determining transcription factors prime cis-regulatory  
1117 elements required for macrophage and B cell identities. *Mol Cell* 2010;38:576-89.
- 1118 66. Conrad T, Ørom UA. Cellular Fractionation and Isolation of Chromatin-Associated  
1119 RNA. *Methods Mol Biol* 2017;1468:1-9.
- 1120 67. Langmead, B., and Salzberg, S.L. Fast gapped-read alignment with Bowtie 2.  
1121 *Nature Methods* 2012;9:357–359.
- 1122 68. Dobin A, Davis CA, Schlesinger F, Drenkow J, Zaleski C, Jha S, et al. STAR:  
1123 ultrafast universal RNA-seq aligner. *Bioinformatics* 2013;29:15-21.
- 1124 69. Anders, S., Pyl, P.T., and Huber, W. HTSeq--a Python framework to work with high-  
1125 throughput sequencing data. *Bioinformatics* 2015;31:166–169.
- 1126 70. Love, M.I., Huber, W., and Anders, S. Moderated estimation of fold change and  
1127 dispersion for RNA-seq data with DESeq2. *Genome Biol* 2014;15:550.

- 1128 71. Luo, W., Friedman, M.S., Shedden, K., Hankenson, K.D., and Woolf, P.J. GAGE:  
1129 generally applicable gene set enrichment for pathway analysis. *BMC Bioinformatics*  
1130 2009;10:161.
- 1131 72. Luo, W., and Brouwer, C. Pathview: an R/Bioconductor package for pathway-based  
1132 data integration and visualization. *Bioinformatics* 2013;29:1830–1831.
- 1133 73. Huang YH, Klingbeil O, He XY, Wu XS, Arun G, Lu B, et al. POU2F3 is a master  
1134 regulator of a tuft cell-like variant of small cell lung cancer. *Genes Dev* 2018;32:915-  
1135 28.
- 1136 74. Spector DL, Smith HC. Redistribution of U-snRNPs during mitosis. *Exp Cell Res*  
1137 1986;163:87-94.
- 1138
- 1139
- 1140
- 1141
- 1142
- 1143

## Figure 1. Characterization of *Mammary Tumor Associated RNA 25 (MaTAR25)*

- (A) Representation of the *MaTAR25* gene locus. *MaTAR25* is an intergenic lncRNA gene located on mouse chromosome 2, and the *MaTAR25* RNA transcript contains 2 exons and a poly (A) tail.
- (B) 5' and 3' rapid amplification of cDNA ends (RACE) was performed to identify the full length *MaTAR25* transcript.
- (C) The full length *MaTAR25* transcript was confirmed by Northern blot analysis to be ~2000 nt. 20  $\mu$ g or 30  $\mu$ g total RNA extracted from MMTV-PyMT primary cells was electrophoresed on a 1% agarose gel and probed.
- (D) *In vitro* transcription and translation reactions were performed to confirm that *MaTAR25* does not produce a peptide. The reaction products were run on a 4-20% gradient SDS-PAGE gel, and the signals were detected by HRP-conjugated Streptavidin. Luciferase control DNA and *Xenopus laevis* Histone H2B (HISTH2B) expressing plasmids were used as positive controls and empty vector as a negative control.
- (E) Representative smRNA-FISH images showing localization of *MaTAR25* RNA transcripts within nuclei of MMTV-PyMT and MMTV-Neu-NDL primary cells. Scale bars are 10  $\mu$ m.

## Figure 2. *MaTAR25* knockout affects 4T1 cell viability, migration, and invasion *in vitro*; all of which can be rescued by ectopic expression of *MaTAR25* in knockout cells

- (A) CRISPR/Cas9 was used to generate *MaTAR25* KO clones in 4T1 cells. Pairs of sgRNAs were introduced targeting upstream and downstream of the transcription start site of *MaTAR25*, resulting in 390-620 bp genomic deletions, and a *Renilla* Luciferase sgRNA was used as a negative control. Knockout clones were selected by genomic PCR and Sanger sequencing for homozygous genomic deletion. qRT-PCR and representative images of smRNA-FISH are shown to confirm *MaTAR25* KO. Scale bars are 5  $\mu$ m.

- (B) 4T1 cells were seeded at the same cell density in 12-well tissue culture plates at day 0 and cell counting was performed at different time points. The mean cell numbers of three independent replicates of 4T1 control groups and *MaTAR25* KO groups is shown  $\pm$  SD (n=3). \* $p < 0.05$  (student's t-test).
- (C) Live cell tracking was performed over time to examine cell migration. Images were collected every 5 minutes for a total of 8 hours and analyzed by CellTracker image processing software. The mean relative migration distance ( $\mu\text{m}$ ) of two independent replicates of 4T1 control groups and *MaTAR25* KO groups is shown  $\pm$  SD (n=3). \* $p < 0.05$
- (D) 24-well Boyden chamber invasion assay (24 hours). The mean relative cell invasion of three independent replicates of 4T1 control groups and *MaTAR25* KO groups is shown  $\pm$  SD (n=3). \* $p < 0.05$  (student's t-test).
- (E) Ectopic expression of *MaTAR25* or GFP was used as positive and negative controls to assess rescue in a cell viability assay, or (F) cell invasion assay. The mean cell numbers and mean relative cell invasion of three independent replicates of 4T1 Control1, *MaTAR25* KO2, *MaTAR25* KO2 with GFP expression, and *MaTAR25* KO2 with *MaTAR25* ectopic expression is shown  $\pm$  SD (n=3) \* $p < 0.05$  (student's t-test).

### **Figure 3. *MaTAR25* knockout impairs tumor growth and metastasis *in vivo***

- (A) 4T1 control or *MaTAR25* KO cells were injected orthotopically into the mammary fat pad of female BALB/c mice. Primary tumors were measured every week over a period of four weeks and the mean tumor volume of 8 mice per group is shown  $\pm$  SE. \* $p < 0.05$  (student's t-test).
- (B) Mice were sacrificed and tumors were collected at day 28 to compare the tumor growth rate between the control group and *MaTAR25* KO groups. Tumors derived from *MaTAR25* KO cells showed a 56% reduction in tumor growth. The mean tumor wet weight is shown  $\pm$  SE. \* $p < 0.05$  (student's t-test).
- (C) Female BALB/c mice were injected into the tail vein with 4T1 Control1 or *MaTAR25* KO cells. Mice were monitored every week and sacrificed at day 21. Mouse lungs were collected and imaged (left panel), and lung metastatic nodules were counted to

compare the metastatic ability between the control group and *MaTAR25* KO group (right panel). Mice injected with *MaTAR25* KO cells exhibited a 62% reduction in lung metastatic nodules.

- (D) Schematic showing the approach for ASO mediated knockdown of *MaTAR25* in MMTV-Neu-NDL mice. Two independent *MaTAR25* ASOs or a control scASO were used for subcutaneous injection. Primary tumors were measured twice per week and the mean tumor volume of 7 mice per group is shown  $\pm$  SE.  $*p < 0.05$  (student's t-test).
- (E) Representative hematoxylin and eosin (H&E) stained tumor images showing the different histological phenotypes between tumor samples from scASO injected mice and *MaTAR25* ASO injected groups.

#### **Figure 4. *MaTAR25* is a positive upstream regulator of *Tns1***

- (A) Cell fractionation was performed to isolate cytoplasmic, nucleoplasmic, and chromatin associated RNA. qRT-PCR was used to determine the subcellular localization ratio of *MaTAR25* transcripts.  *$\beta$ -actin* and *Malat1* were used as marker RNAs for quality control of cell fractionation.
- (B) Schematic diagram showing the targeting of biotin labeled oligonucleotides binding *MaTAR25* transcripts for chromatin isolation by RNA purification (ChIRP)-seq. Odd and even oligo pools (7 oligos binding different regions within the *MaTAR25* transcript in each pool) were used for ChIRP-seq, and qRT-PCR was performed to assess RNA purification enrichment.
- (C) Venn diagram showing differentially expressed genes in *MaTAR25* KO cells identified from RNA-Seq overlapped with *MaTAR25* ChIRP-seq data. A total 446 overlapping genes were identified, and the top candidate genes are listed.
- (D) Validation of *Tns1* as a *MaTAR25* targeted gene by qRT-PCR and immunoblotting in 4T1 control and *MaTAR25* KO cells.
- (E) The RNA expression level of *Tns1* is rescued upon ectopic expression of *MaTAR25* in *MaTAR25* KO cells as determined by qRT-PCR.

- (F) CRISPR/Cas9 targeting was used in 4T1 cells to generate *Tns1* knockout clones. The upper panel shows expression levels of *Tns1* in 4T1 control, *Tns1* KO Clone1, and *Tns1* KO Clone2 by immunoblotting. The lower panel shows the cell counting viability assay results of three independent replicates of 4T1 Control1, *Tns1* KO1, and *Tns1* KO2. Results are mean  $\pm$  SD (n=3) \* $p < 0.05$  (student's t-test).
- (G) Ectopic expression of *Tns1* in *MaTAR25* KO cells rescues the cell viability defect. The top panel shows expression levels of *Tns1* in 4T1 control1, *MaTAR25* KO2, *MaTAR25* KO2 with *Tns1* ectopic expression Clone1. The bottom panel shows the cell counting viability assay results of three independent replicates of 4T1 Control1, *MaTAR25* KO2, *MaTAR25* KO2 with *MaTAR25* ectopic expression, and *MaTAR25* KO with *Tns1* ectopic expression Clone1-3. Results are mean  $\pm$  SD (n=3) \* $p < 0.05$  (student's t-test).

### Figure 5. *MaTAR25* interacts with PURB to carry out its function

- (A) Scatterplot depicts the fold enrichment of protein candidates from isobaric tags for the relative and absolute quantitation (iTRAQ) analysis comparing two independent oligo pair sets targeting *MaTAR25* RNA transcripts vs PPIB RNA transcripts.
- (B) Upper: immunoblot analysis of PURA and PURB following pull-down of *MaTAR25* or PPIB from 4T1 cells. Lower: immunoblot analysis of PURB following the pull-down of *MaTAR25* or PPIB from 4T1 cells or 4T1 *MaTAR25* KO cells.
- (C) *MaTAR25*, PPIB, and *Gapdh* transcripts were assessed by qRT-PCR in endogenous PURB, or IgG (negative control) immunoprecipitates from 4T1 cells. Fold enrichment over IgG signal is shown  $\pm$  SD (n=3). Immunoblot analysis of PURB was performed as a control.
- (D) qRT-PCR analysis and immunoblotting of *Tns1* expression in 4T1 cells following ectopic over-expression of PURB. The relative expression levels are shown  $\pm$  SD (n=3).
- (E) ChIP-qPCR analysis of PURB occupancy over the identified *MaTAR25* targeting region and non-targeting region of the *Tns1* DNA locus by ChIRP-seq analysis.

ChIP-qPCR was performed in 4T1 control cells, 4T1 *MaTAR25* KO cells, and upon ectopic expression of *MaTAR25* in *MaTAR25* KO cells. Primers for a *MaTAR25* non-targeting region and the *Gapdh* TSS were used as negative controls. Bar graphs represent the mean  $\pm$  SD (n=2).

**Figure 6. *LINC01271* is the human ortholog of *MaTAR25***

- (A) All potential human orthologs of *MaTAR25* (*hMaTAR25*) were identified based on conservation of genomic location (synteny). RNA-seq data from The Cancer Genome Atlas (TCGA) was analyzed to evaluate the expression status of all potential *hMaTAR25* candidates by comparison of 1128 TCGA breast tumor datasets to 113 normal breast tissue controls. Fold change and statistical significance was calculated for the entire data matrix using DESeq2 (29).
- (B) Attempted rescue of 4T1 *MaTAR25* KO cells upon independent ectopic expression of two transcript isoforms of *LINC01270* (*LINC01270.1*, *LINC01270.2*), or *LINC01271* in cell viability assays. The mean cell numbers of three independent replicates of 4T1 control, *MaTAR25* KO, *MaTAR25* KO with GFP, *LINC01270.1*, *LINC01270.2*, and *LINC01271* is shown  $\pm$  SD (n=3) \* $p < 0.05$  (student's t-test). Only ectopic expression of *LINC01271* can rescue the *MaTAR25* KO cell viability phenotype.
- (C) 4T1 *MaTAR25* KO cells with ectopic expression of GFP was used as a control to assess rescue in a cell invasion assay. The mean relative cell invasion of two independent replicates of 4T1 control, *MaTAR25* KO, *MaTAR25* KO with GFP, *LINC01271* ectopic expression is shown  $\pm$  SD (n=2) \* $p < 0.05$  (student's t-test). Ectopic expression of *LINC01271* can rescue the *MaTAR25* KO cell invasion phenotype.
- (D) RNA expression level of *Tns1* was determined in *MaTAR25* KO cells ectopically expressing *LINC01270.1*, *LINC01270.2*, or *LINC01271* by qRT-PCR. The protein level of TNS1 was also examined in *MaTAR25* KO cells with ectopic expression of *LINC01271* by immunoblot analysis.

(E) Three different ASOs targeting *LINC01271* were used to independently knockdown *LINC01271* in MDA-MB-231 LM2 cells. Left panel: the knockdown efficiency is shown  $\pm$  SD (n=3) by qRT-PCR after 24 hours treatment of ASOs. Cells were seeded at the same density ( $5 \times 10^4$ /well) in 12-well tissue culture plates at day 0, ASOs were added to the culture medium and cell counting was performed at different time points to measure cell numbers. Right panel: The mean cell numbers of three independent replicates of MDA-MB-231 LM2 mock treated control cells, MDA-MB-231 LM2 cells treated with scrambled ASO, MDA-MB-231 LM2 cells independently treated with 3 different *LINC01271* ASOs is shown  $\pm$  SD (n=3) \* $p < 0.05$  (student's t-test).

### **Figure 7. *LINC01271* expression in breast tumors and lung metastases**

- (A) Representative smRNA-FISH images showing the expression of *LINC01271* in human breast tumor sections from different stages of breast cancer. Scale bars are 20  $\mu$ m.
- (B) Representative smRNA-FISH images showing the expression pattern of *LINC01271* within luminal subtype human primary breast tumors and lung metastases sections from the same patients. Scale bars are 20  $\mu$ m.
- (C) Working model of *MaTAR25* function.



A

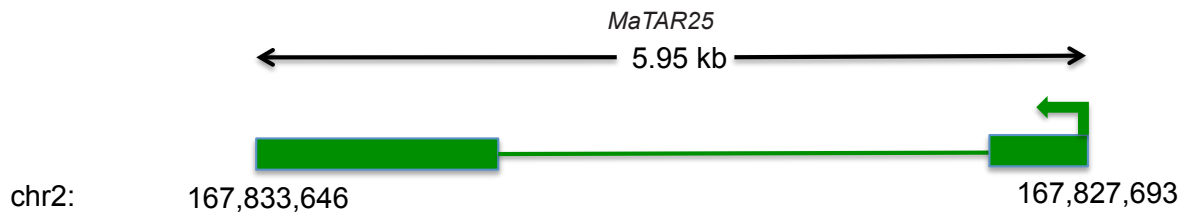

B

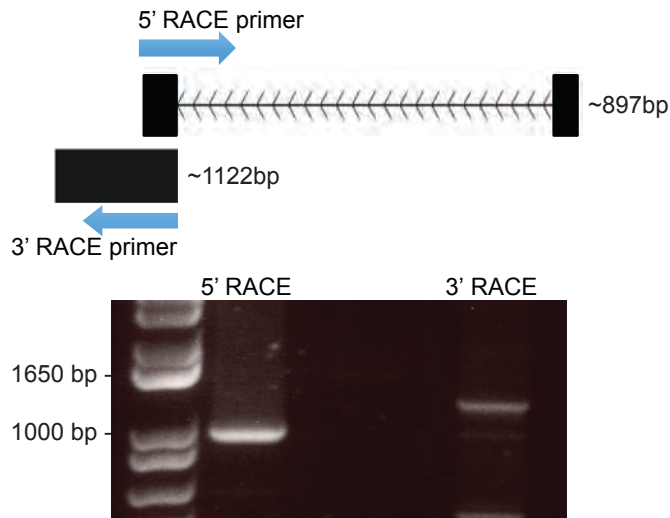

C

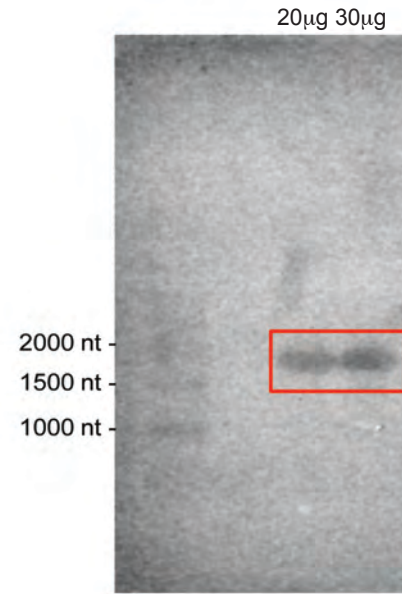

D

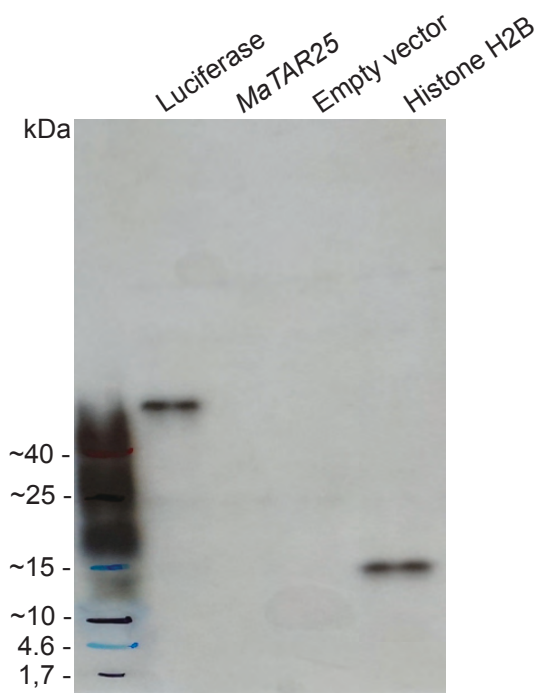

E

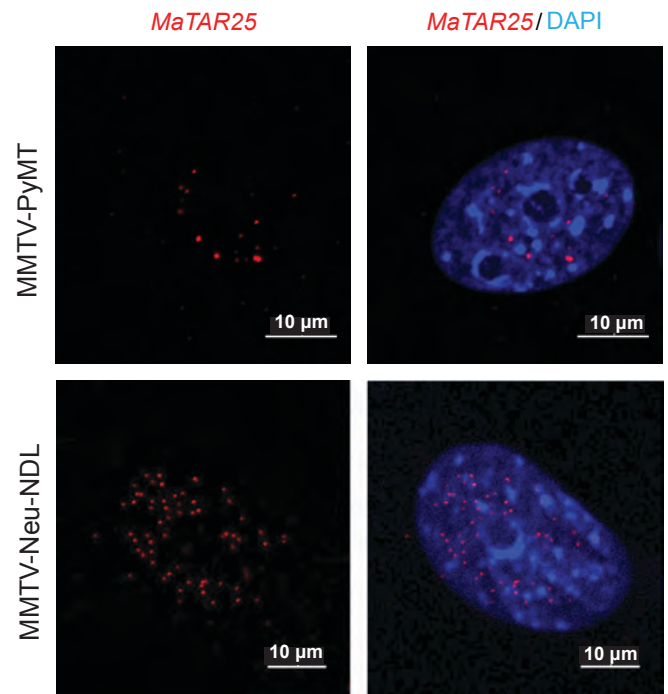

**A**

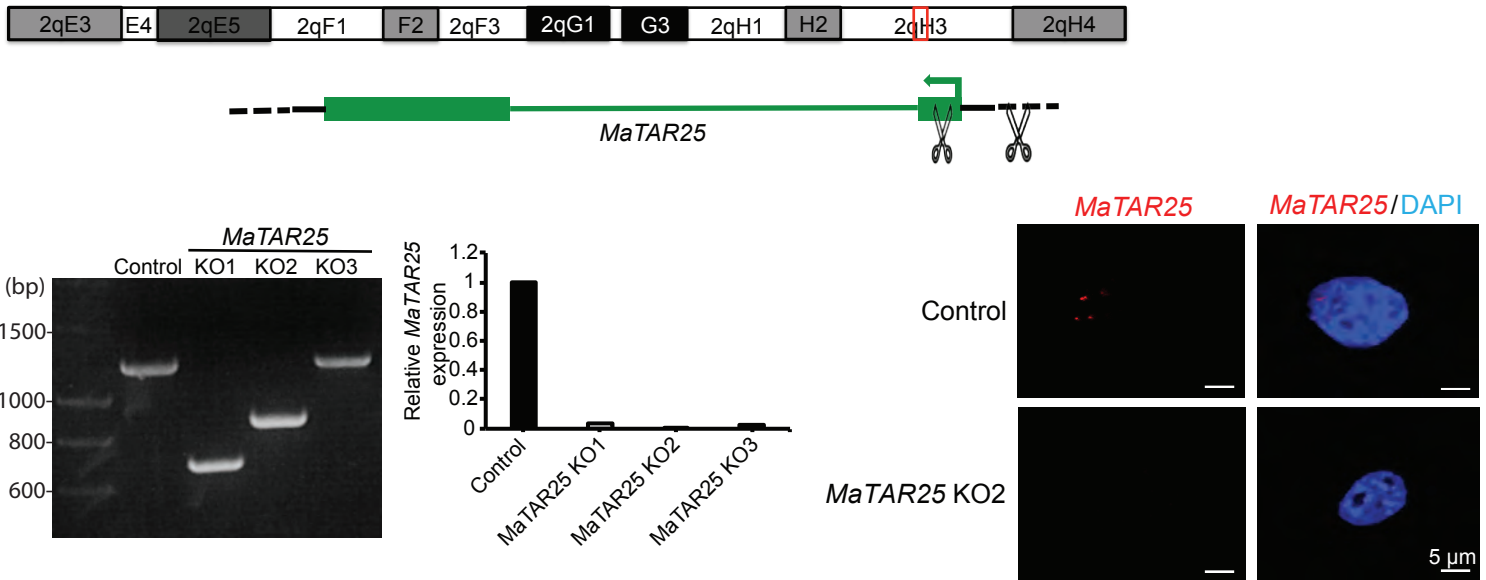

**B**

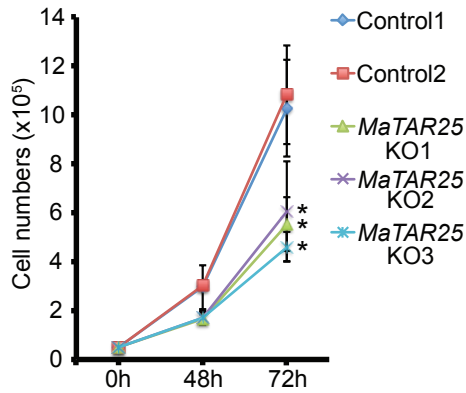

**C**

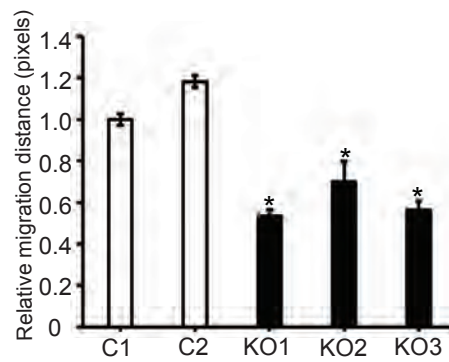

**D**

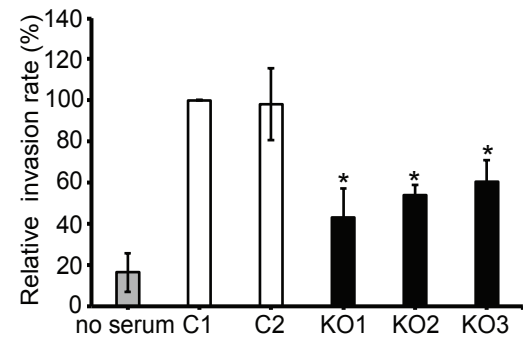

**E**

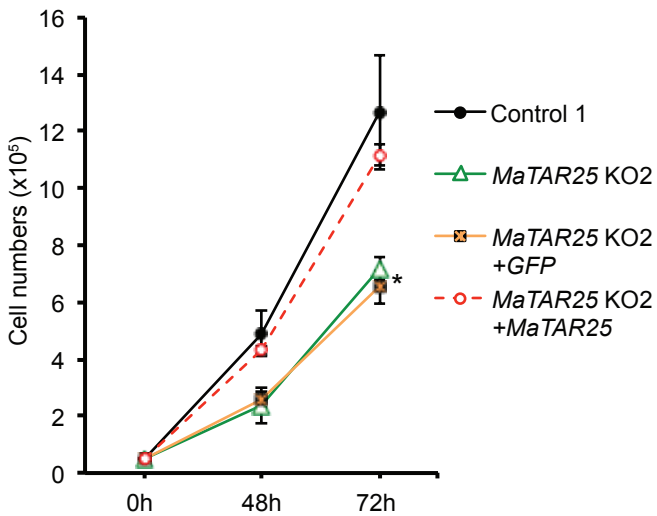

**F**

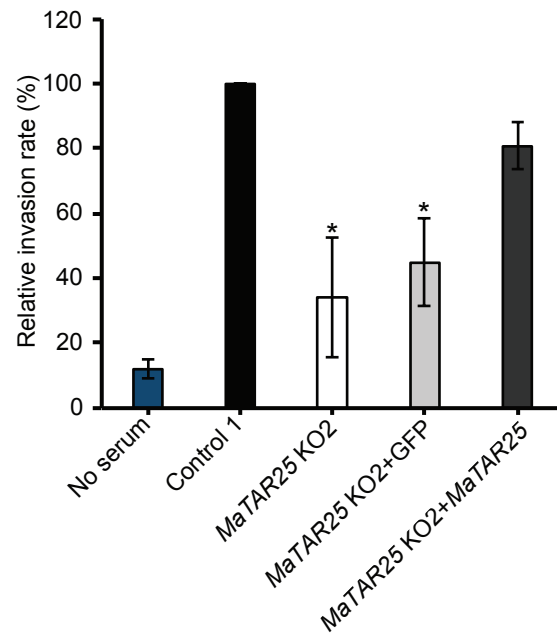

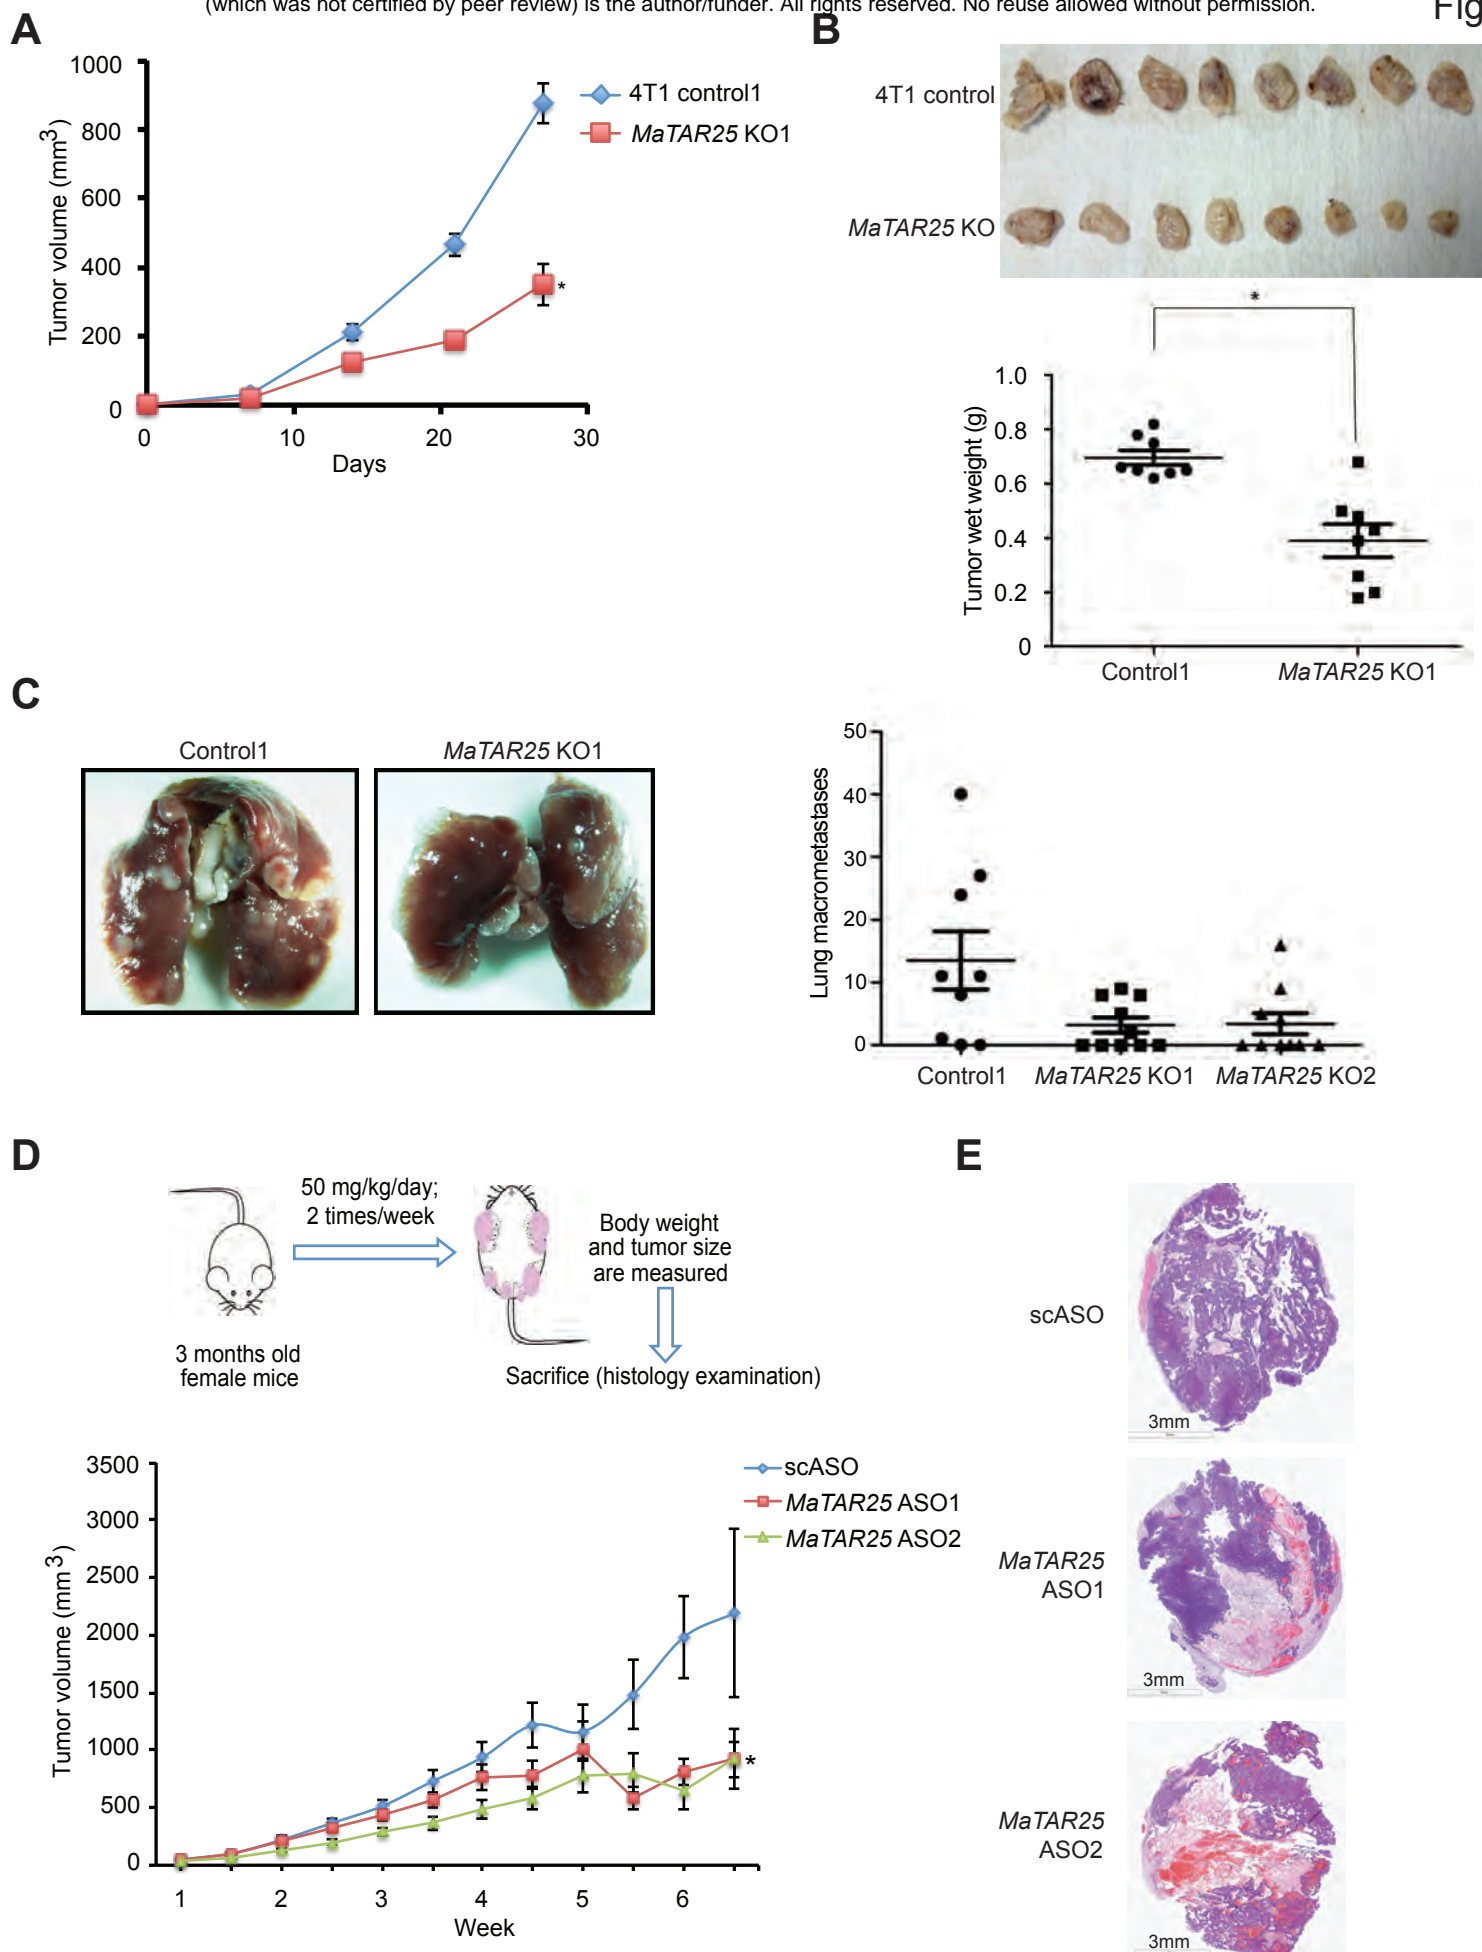

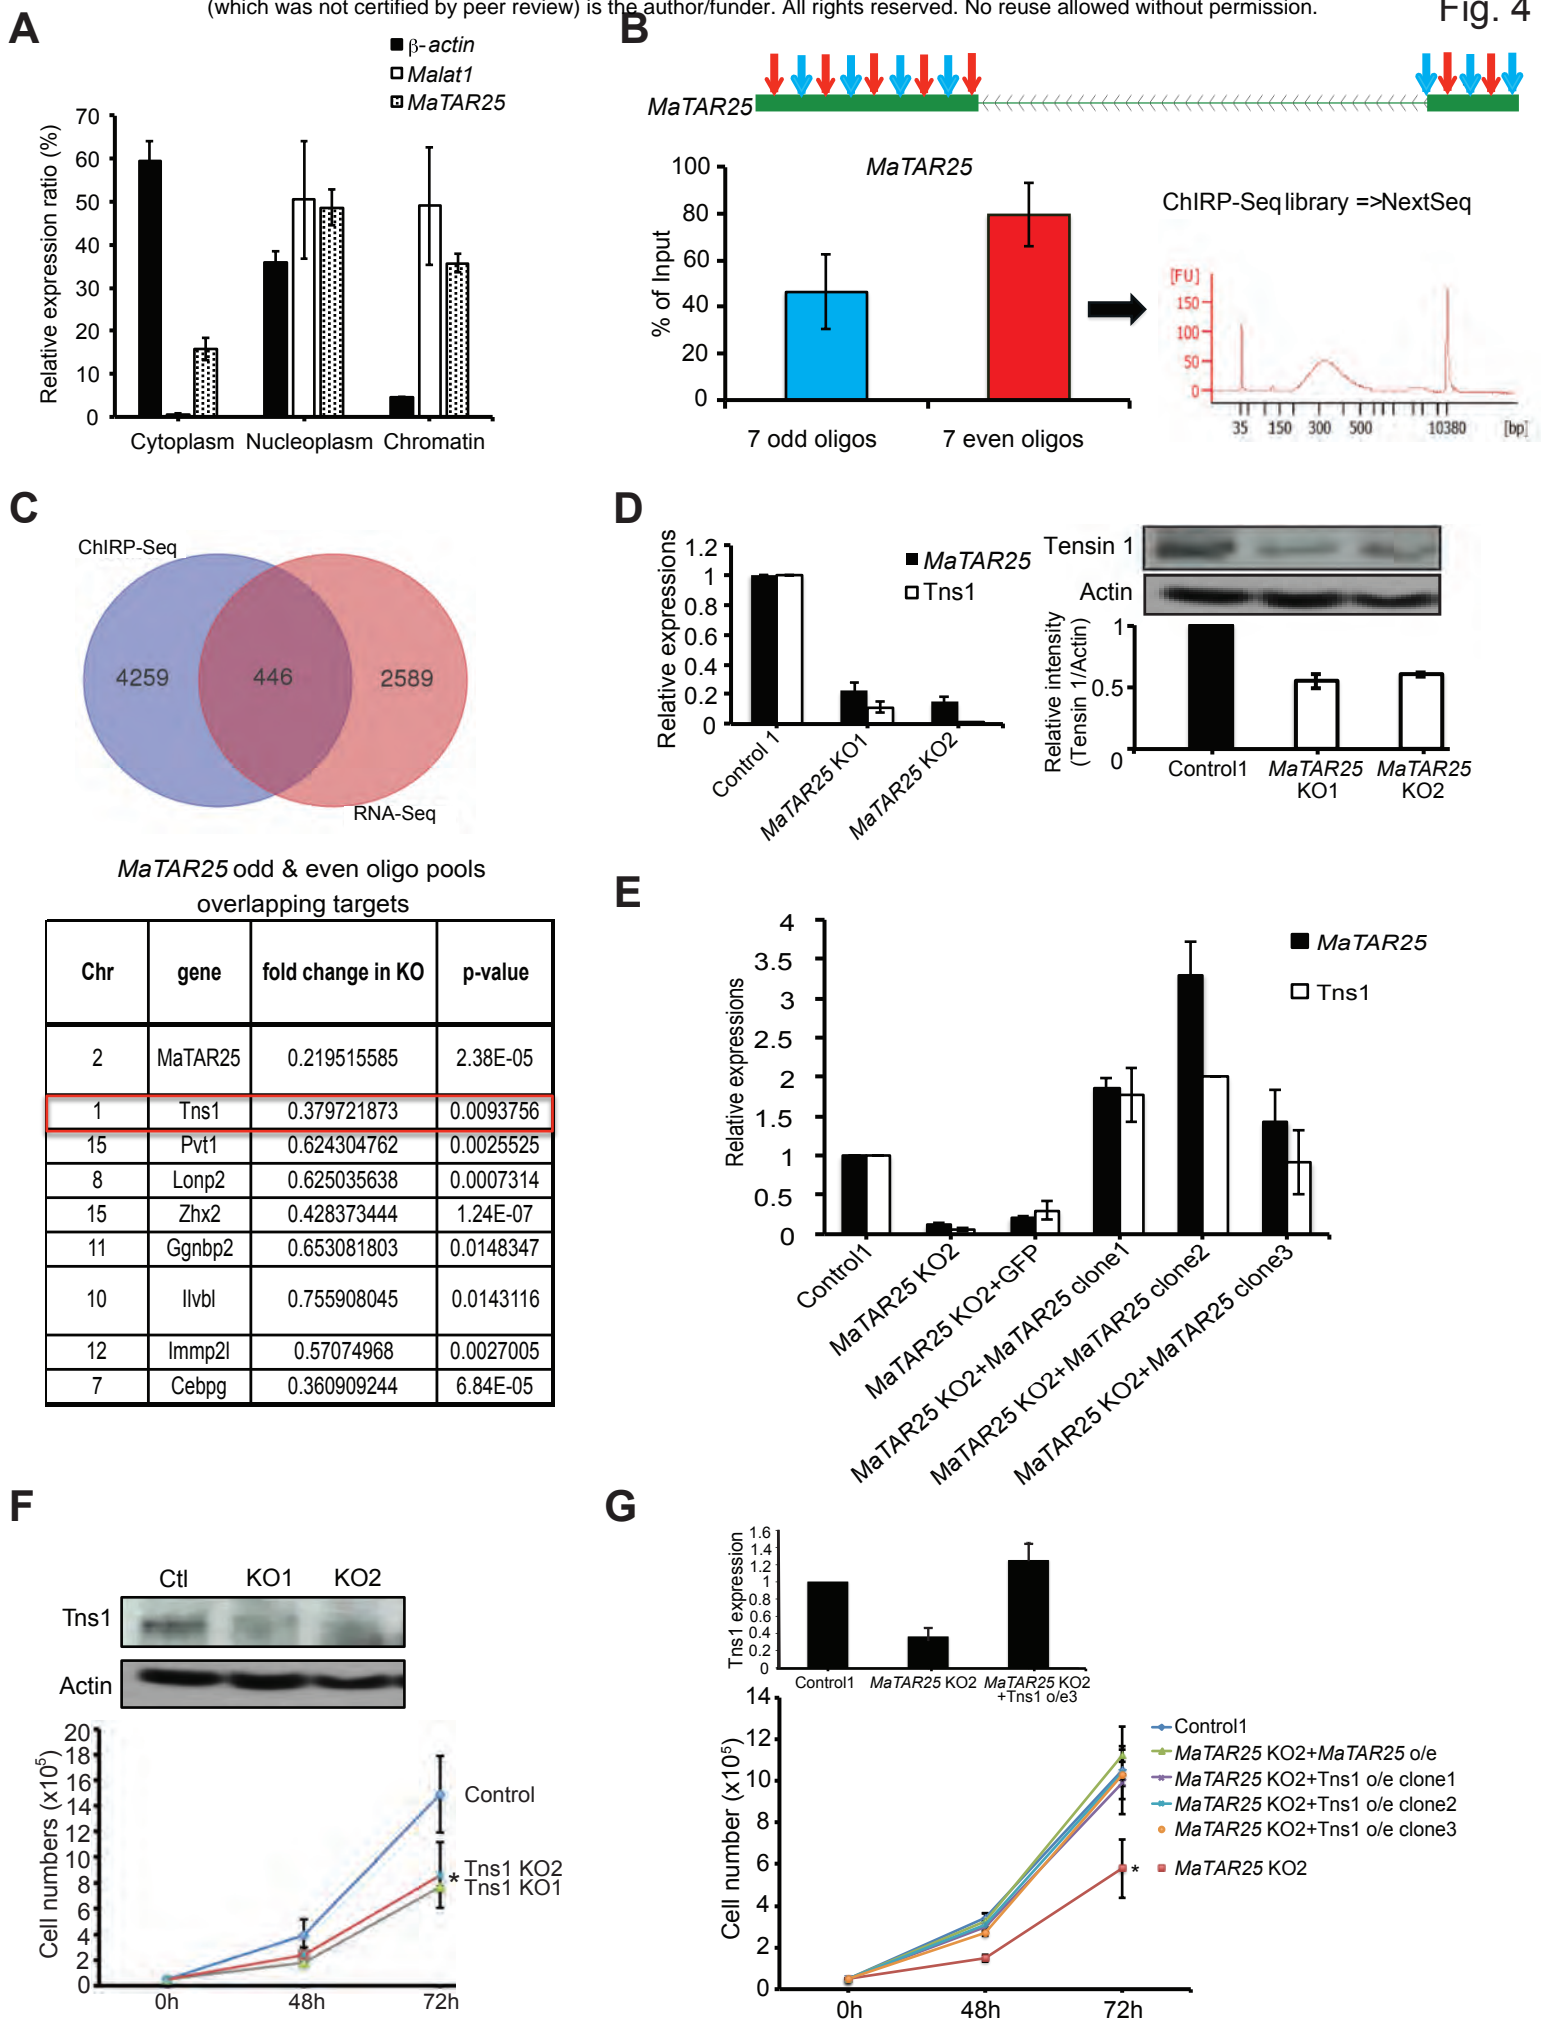

**A**

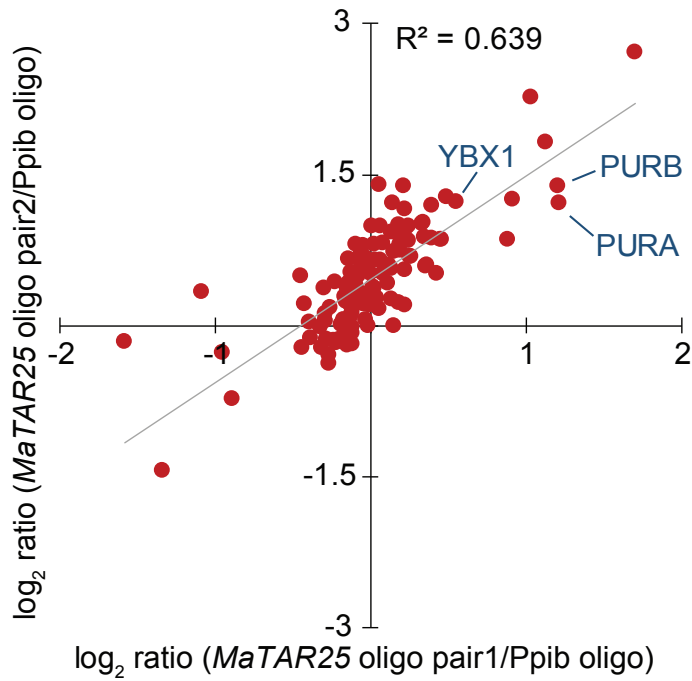

**B**

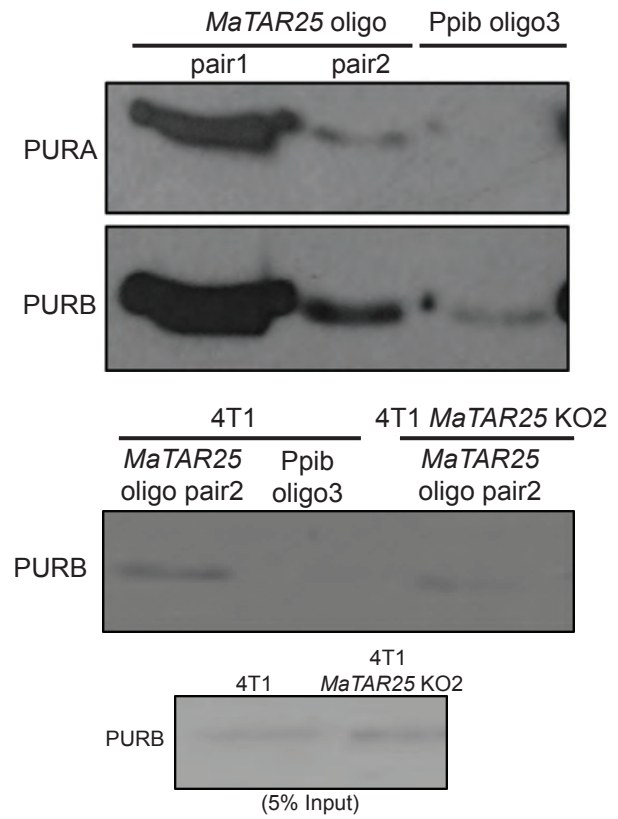

**C**

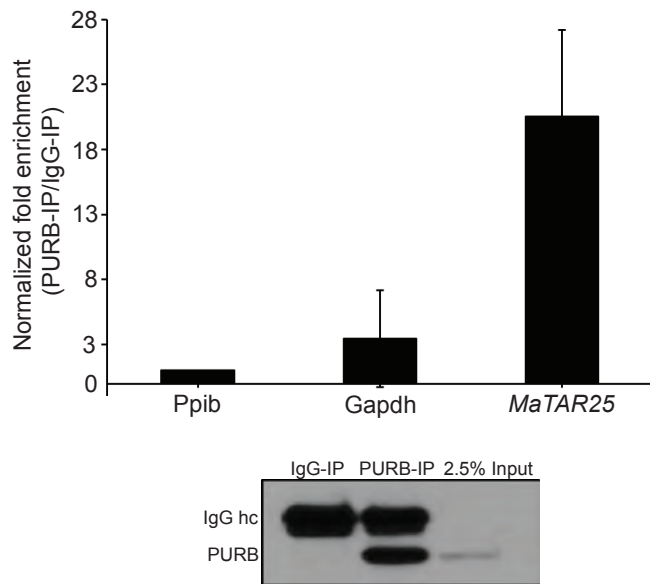

**D**

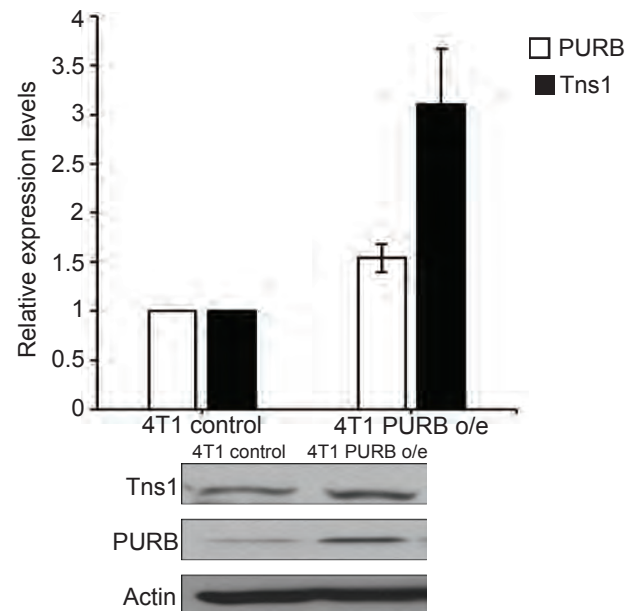

**E**

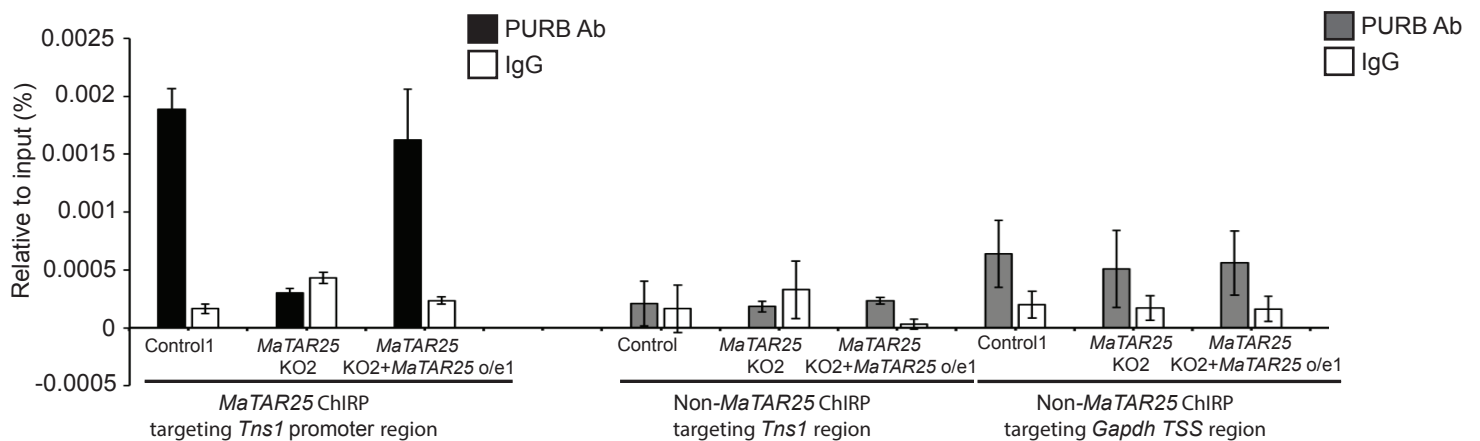

**A**

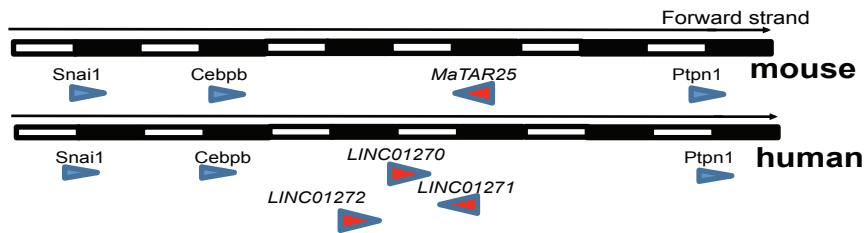

|                   | Potential human counterpart | Fold change | P value  |                  |
|-------------------|-----------------------------|-------------|----------|------------------|
| <i>hMaTAR25.1</i> | ENSG00000203999             | 1.6         | 1.88E-06 | <i>LINC01270</i> |
| <i>hMaTAR25.2</i> | ENSG00000233077             | 1.7         | 8.67E-06 | <i>LINC01271</i> |
| <i>hMaTAR25.3</i> | ENSG00000224397             | 1.04        | 7.18E-01 | <i>LINC01272</i> |

**B**

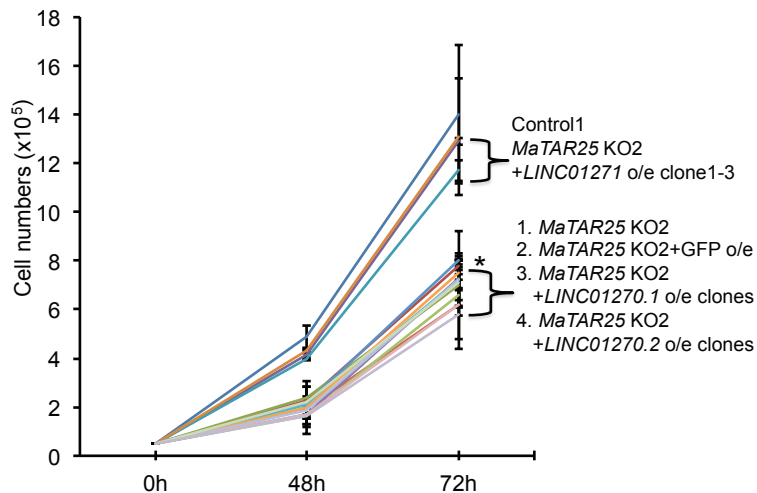

**C**

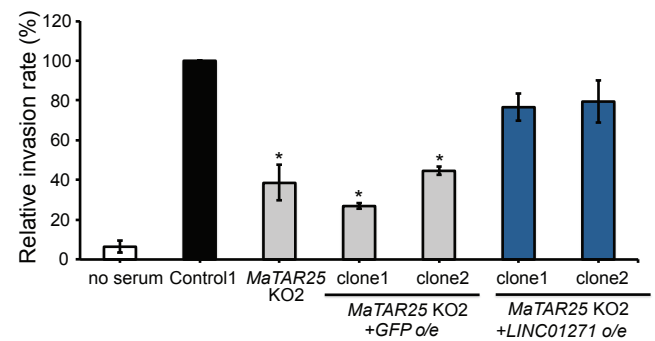

**D**

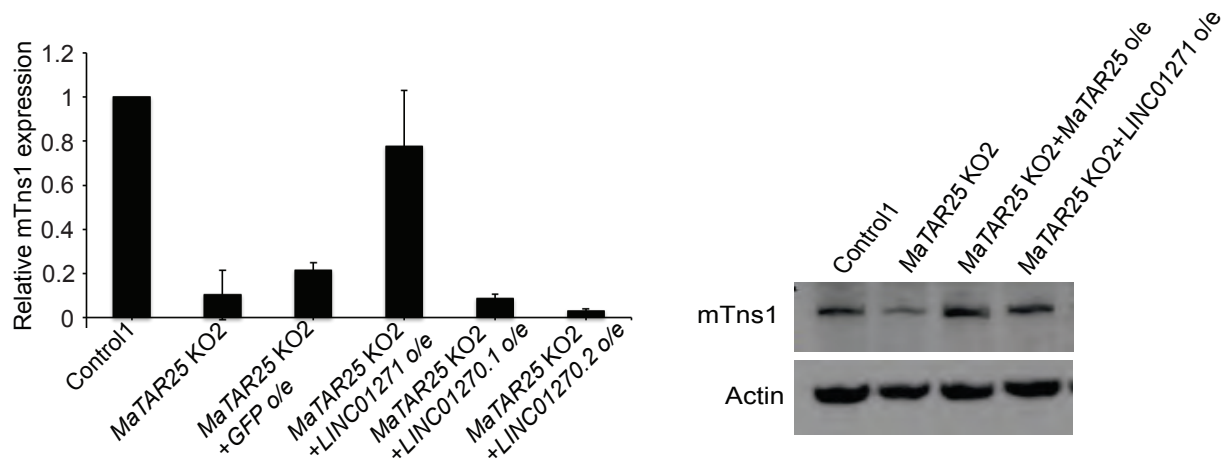

**E**

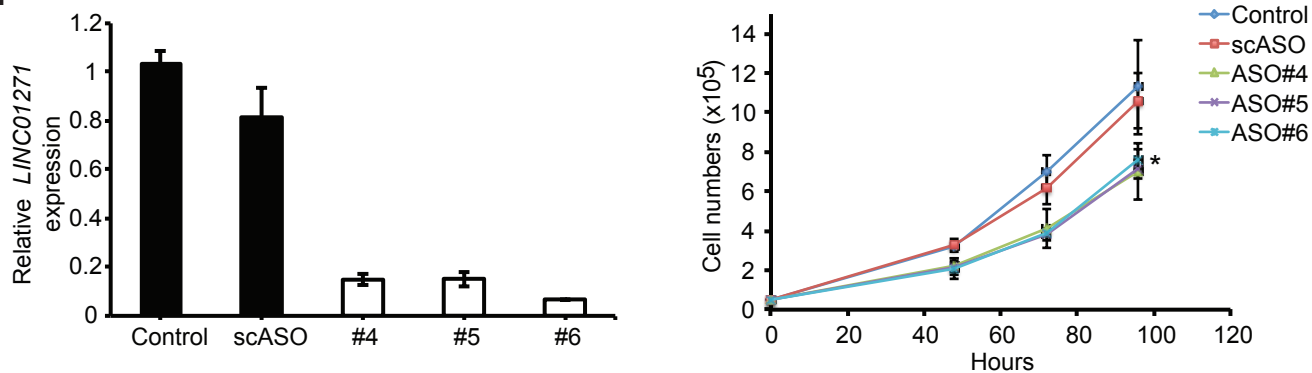

A

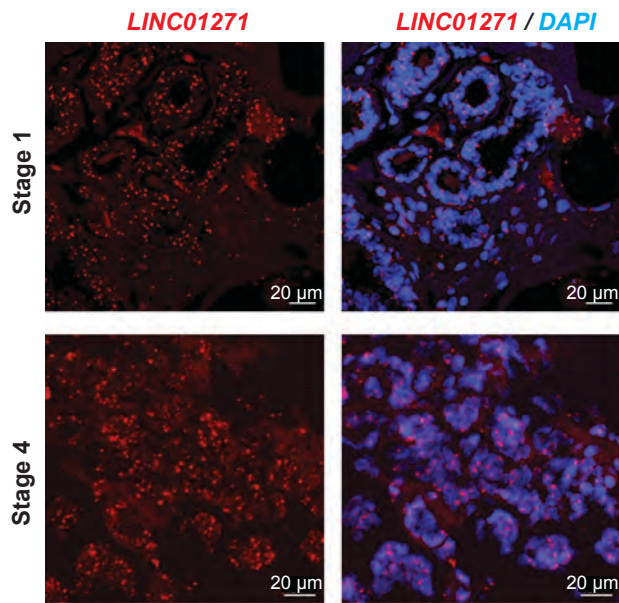

B

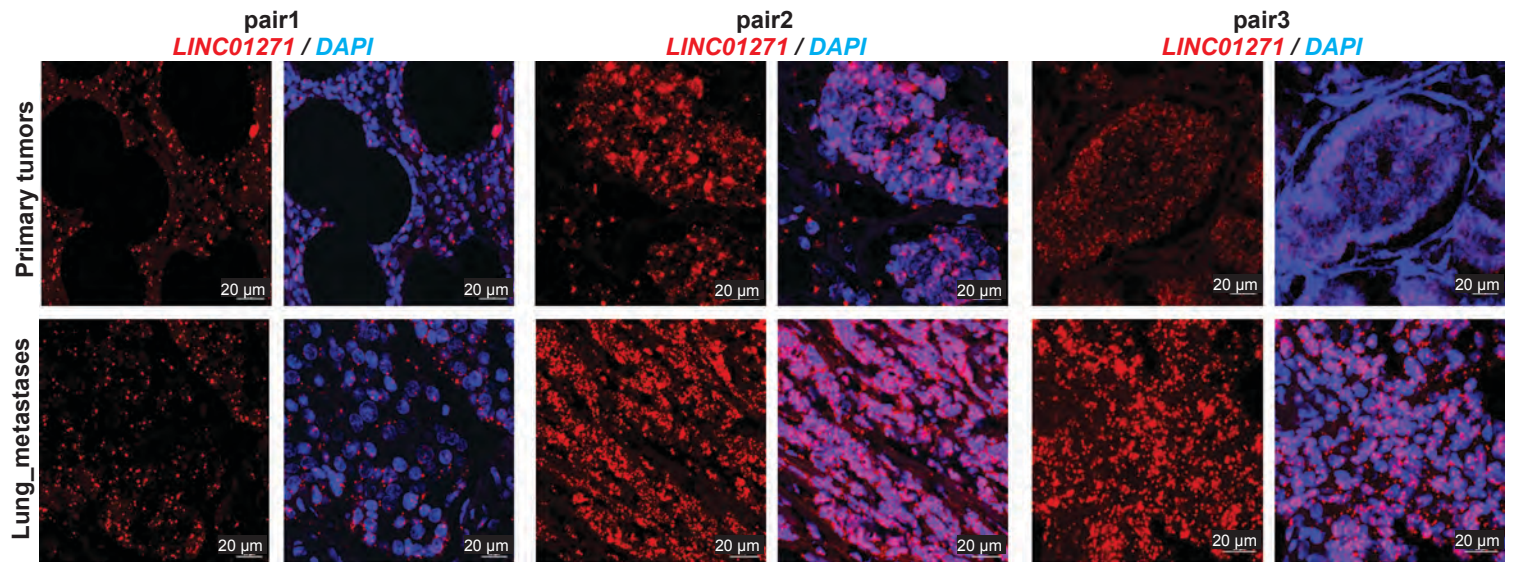

C

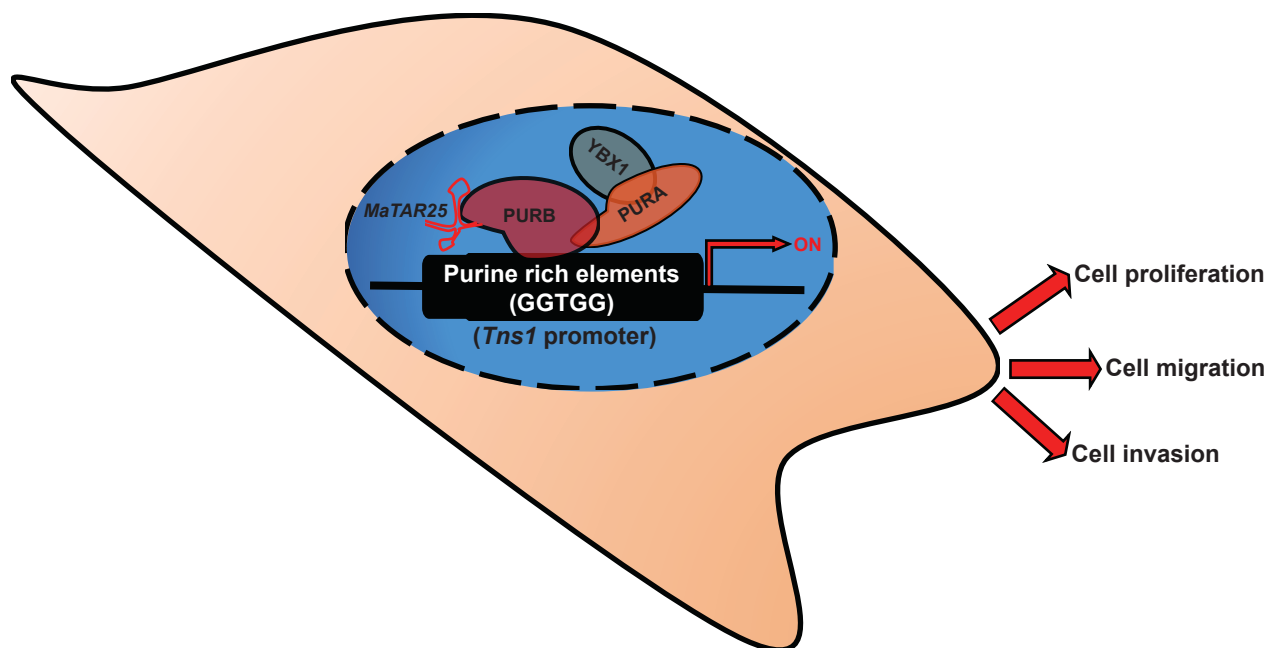

Source: https://www.biorxiv.org/content/biorxiv/early/2020/02/03/2020.02.03.931881.full.pdf
